# Supplementary material for: A fluorescent calixarene-based dimeric capsule constructed via a MII–terpyridine interaction: cage structure, inclusion properties and drug release
Source: PubMed Central journal article supplement — RSC Adv. 2018 Jun 20;8(40):22530–5. doi: 10.1039/c8ra02146e (PMC9081444; doi:10.1039/c8ra02146e), 2018-06-20
Supplement: RA-008-C8RA02146E-s001.pdf [file RA-008-C8RA02146E-s001.pdf]

## Supporting Information

A Fluorescent Calixarene-based Dimeric Capsule Constructed by a MII-Terpyridine  
Interaction: Cage Structure, Inclusion Properties and Drug Release

Jun-Fang Wang,<sup>a</sup> Li-Yuan Huang,<sup>b</sup> Jian-Hua Bu,<sup>\*c</sup> Shao-Yong Li,<sup>d</sup> Su Qin,<sup>b</sup> Yao-Wei Xu,<sup>\*b</sup> Jun-  
Min Liu,<sup>\*b</sup> Cheng-Yong Su<sup>b</sup>

**Page S3**---Materials and Instrumentation; Computational method.

**Page S3**---Ligand Synthesis.

**Page S4**---Self-assembly of cages.

**Page S6**---Figure S1  $^1\text{H}$  NMR spectra of (a) ligand **L1**, (b)  $\text{Cd}_4(\text{L1})_2(\text{PF}_6)_8$ , (c)  $\text{Cd}_4(\text{L1})_2(\text{OTf})_8$ , and (d)  $\text{Zn}_4(\text{L1})_2(\text{OTf})_8$ .

**Page S7**---Figure S2  $^{13}\text{C}$  NMR spectra of (a)  $\text{Cd}_4(\text{L1})_2(\text{PF}_6)_8$  and (b)  $\text{Zn}_4(\text{L1})_2(\text{OTf})_8$ .

**Page S7**---Figure S3  $^1\text{H}$  DOSY spectrum of  $\text{Zn}_4(\text{L1})_2(\text{OTf})_8$ .

**Page S8**---Figure S4 ESI-MS spectrum of  $\text{Cd}_4(\text{L1})_2(\text{BF}_6)_8$ .

**Page S9**---Figure S5 ESI-MS spectrum of  $\text{Zn}_4(\text{L1})_2(\text{OTf})_8$ .

**Page S10**---Figure S6 AFM image of  $\text{Zn}_4(\text{L1})_2(\text{OTf})_8$  on mica surface.

**Page S10**---Figure S7  $^1\text{H}$  NMR study of (a) free  $\text{Cd}_4(\text{L1})_2(\text{PF}_6)_8$ , (b) mercaptopurine@ $\text{Cd}_4(\text{L1})_2(\text{PF}_6)_8$ , and (c) free mercaptopurine.

**Page S11**---Figure S8  $^1\text{H}$  DOSY spectrum of mercaptopurine@ $\text{Cd}_4(\text{L1})_2(\text{PF}_6)_8$ .

**Page S16**---Figure S9 ESI-MS study of mercaptopurine@ $\text{Zn}_4(\text{L1})_2(\text{OTf})_8$ .

**Page S21**---Figure S10 ESI-MS study of mercaptopurine@ $\text{Cd}_4(\text{L1})_2(\text{PF}_6)_8$ .

**Page S22**---Figure S11  $^1\text{H}$  NMR spectra of the mixture of 25,26,27,28-tetrabutoxycalix[4]arene, mercaptopurine, and  $\text{Zn}(\text{phenyl-tpy})_2(\text{CF}_3\text{SO}_3)_2$ .

**Page S22**---Figure S12  $^1\text{H}$  NMR of mercaptopurine@ $\text{Zn}_4\text{L}_2$  cages.

**Page S23**---Table S1 Cartesian coordinates of  $\text{Zn}_4\text{L}_2$  cages from B3LYP/6-31Gd optimization.

**Page S30**---Table S2 Cartesian coordinates of mercaptopurine@ $\text{Zn}_4\text{L}_2$  cages from B3LYP/6-31Gd optimization.

**Page S37**---Table S3 Energies of  $\text{Zn}_4\text{L}_2$  cages, mercaptopurine, and mercaptopurine @ $\text{Zn}_4\text{L}_2$  obtained from computational study (B3LYP/6-31Gd).

## Materials and Instrumentation

$^1\text{H}$  NMR,  $^{13}\text{C}$  NMR, and DOSY spectra were measured on a Bruker AVANCE

400 MHz instrument. HRESI-TOF mass spectra were measured on Bruker maXis 4G. The data analyses of ESI-TOF mass spectra were processed on Bruker Data Analysis software and the simulations were performed on Bruker Isotope Pattern software. The absorption spectra were observed with a Shimadzu UV-3600 spectrometer and fluorescence spectra were measured with an Edinburgh Instruments Ltd FLS980 spectrometer. All chemicals are of reagent grade quality obtained from commercial sources and without further purification.

### Computational method

Geometry optimization of  $Zn_4(L1)_2$  cage and mercaptopurine@ $Zn_4(L1)_2$  in acetonitrile was executed at the level of B3LYP/6-31Gd with Gaussian 09.<sup>[1]</sup> Solvent effect was taken into account by using the polarizable continuum model (PCM). The complex stabilization energy ( $E_s$ ) was obtained by subtracting the respective energy of cage and guest from the one of complex:  $E_s = E(\text{complex}) - [E(\text{cage}) + E(\text{guest})]$ .

### Ligand Synthesis

cone-5,11,17,23-Tetra{4-(2,20:60,200-terpyridyl)-phenyl}-25,26,27,28-tetrabutoxycalix[4]arene (**L1**)

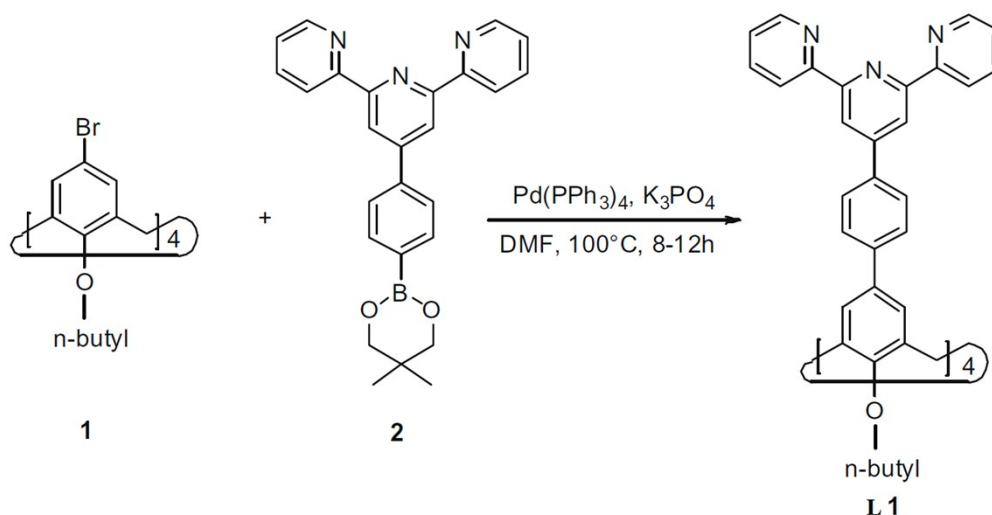

Scheme S1 The synthesis of **L1**

The synthesis process of **L1** was according to our previous publication<sup>[2]</sup>. A mixture of  $K_3PO_4$  (1.56 g, 0.68 mmol),  $Pd(PPh_3)_4$  (139 mg, 12.0  $\mu\text{mol}$ ), cone-5,11,17,23-tetrabromo-25,26,27,28-tetrabutoxycalix[4]arene **1**<sup>[3]</sup> (1.02 g, 1.0 mmol), and 4'-{4-(neopentylglycolatoboron) phenyl}-2,20:60,200-terpyridine **2**<sup>[4]</sup> (2.86 g, 6.79

mmol) in degassed DMF (100 mL) was stirred under argon at 100 °C for 12 h. The reaction mixture was diluted with CHCl<sub>3</sub> (800 mL), and the resulting solution was washed with water (2×200 mL). The organic layer was dried with Na<sub>2</sub>SO<sub>4</sub>, the solvent was evaporated, and the residue was purified via dissolution in methanol (4×100 mL), leading to precipitation of the crude product as a yellow solid. After column chromatography (basic Al<sub>2</sub>O<sub>3</sub>; eluent: CH<sub>2</sub>Cl<sub>2</sub> to CH<sub>2</sub>Cl<sub>2</sub>/acetone 5:1) followed by recrystallization from CH<sub>2</sub>Cl<sub>2</sub>/methanol 939 mg (0.5 mmol, 50%) analytically pure **L1** was obtained as colorless powder. <sup>1</sup>H NMR (400 MHz, 298 K, THF-*d*<sub>8</sub>, ppm): δ 8.61 (bs, 8H), 8.46 (d, *J* = 4.6 Hz, 8H), 8.43 (d, *J* = 8.1 Hz, 8H), 7.70 (dd, *J* = 8.1 Hz, *J* = 7.6 Hz, 8H), 7.69 (d, *J* = 7.8 Hz, 8H), 7.40 (d, *J* = 7.8 Hz, 8H), 7.21 (bs, 8H), 7.15 (dd, *J* = 7.6 Hz, *J* = 4.6 Hz, 8H), 4.70 (d, *J* = 13.5 Hz, 4H), 4.11 (t, *J* = 6.8 Hz, 8H), 3.46 (d, *J* = 13.5 Hz, 4H), 2.12-2.05 (m, 8H), 1.66-1.56 (m, 8H), 1.11 (t, *J* = 7.6 Hz, 12H). <sup>13</sup>C NMR (100 MHz, 298 K, THF-*d*<sub>8</sub>, ppm): δ 156.8, 156.3, 149.8, 149.6, 142.8, 137.0, 136.9, 135.4, 127.9, 127.8, 124.1, 121.3, 118.6, 76.0, 33.4, 32.1, 20.4, 14.6. <sup>1</sup>H NMR (400 MHz, 298 K, CDCl<sub>3</sub>, ppm): σ 8.53 (bs, 16H), 8.41 (d, *J* = 7.56 Hz, 8H), 8.05 (d, *J* = 8.32 Hz, 8H), 7.67-7.7 (m, 16H), 7.31 (bs, 8H), 7.14-7.12 (m, 8H), 7.09 (bs, 8H), 4.64 (d, *J* = 13.4 Hz, 4H), 4.06 (t, *J* = 6.84 Hz, 8H), 3.40 (d, *J* = 13.7 Hz, 4H), 2.01 (m, *J* = 7.32 Hz, 8H), 1.55 (m, *J* = 7.84 Hz, 8H), 1.08 (t, *J* = 7.56 Hz, 12H). <sup>13</sup>C NMR (100 MHz, 298 K, CDCl<sub>3</sub>, ppm): σ 156.1, 155.2, 149.3, 148.8, 141.6, 136.3, 135.9, 134.4, 127.3, 127.0, 126.9, 123.2, 121.0, 118.2, 75.2, 32.4, 31.4, 19.5, 14.1. MS (MALDI-TOF) *m/z*: 1878.1 [M<sup>+</sup>].

### Self-assembly of cages

1. The preparation of **Zn<sub>4</sub>(L1)<sub>2</sub>(OTf)<sub>8</sub>** and **Cd<sub>4</sub>(L1)<sub>2</sub>(OTf)<sub>8</sub>** by two methods:
  - A. **L1** (12 mg, 6.39 μmol) and Zn(CF<sub>3</sub>SO<sub>3</sub>)<sub>2</sub>/Cd(CF<sub>3</sub>SO<sub>3</sub>)<sub>2</sub> (4.65 mg/5.27 mg, 12.79 μmol) were dissolved in THF (2 ml), respectively. By simply adding a THF solution of **L1** into a THF solution of Zn(CF<sub>3</sub>SO<sub>3</sub>)<sub>2</sub>/Cd(CF<sub>3</sub>SO<sub>3</sub>)<sub>2</sub>, cages were precipitated as a yellow amorphous solid.
  - B. To a mixture of Zn(CF<sub>3</sub>SO<sub>3</sub>)<sub>2</sub>/Cd(CF<sub>3</sub>SO<sub>3</sub>)<sub>2</sub> (4.65 mg/5.27 mg, 12.79 μmol) and **L1** (12 mg, 6.39 μmol) acetonitrile was added. The reaction mixture was placed in an oil bath at 80 °C for 2 h and a clear solution was obtained. The cages were

obtained from diffusing hexane/THF (or ether) into the above reaction solution.

2. The preparation of **Cd<sub>4</sub>(L1)<sub>2</sub>(PF<sub>6</sub>)<sub>8</sub>** by anion exchange:

The counter-ions could be exchanged by adding a methanol of ammonium hexafluorophosphate (PF<sub>6</sub><sup>-</sup>) to acetonitrile solution of **Cd<sub>4</sub>(L1)<sub>2</sub>(OTf)<sub>8</sub>**. The **Cd<sub>4</sub>(L1)<sub>2</sub>(PF<sub>6</sub>)<sub>8</sub>** cages were obtained from diffusing hexane/THF (or ether) into the above reaction solution.

**Zn<sub>4</sub>(L1)<sub>2</sub>(OTf)<sub>8</sub>**: Yield: 90 %. <sup>1</sup>H NMR (400 MHz, 298 K, CD<sub>3</sub>CN, ppm):  $\sigma$  8.80 (bs, 16H), 8.24-8.26 (m, 32H), 7.96-7.93 (m, 32H), 7.49-7.47 (bs, 16H), 6.97 (bs, 16H), 6.59 (bs, 16H), 4.78(d,  $J = 12.9$  Hz, 8H), 4.16 (t,  $J = 6.08$  Hz, 16H), 3.70 (d,  $J = 13.2$ Hz, 8H), 2.22 (m,  $J = 7.32$  Hz, 16H), 1.67 (m,  $J = 7.84$  Hz, 16H), 1.19 (t,  $J = 7.56$  Hz, 24H). <sup>13</sup>C NMR (100 MHz, 298 K, CD<sub>3</sub>CN, ppm):  $\sigma$  158.08, 156.73, 150.00, 148.66, 143.64, 137.37, 134.77, 129.46, 128.16, 127.98, 123.64, 122.25, 120.45, 115.85, 114.91, 113.51, 77.03, 33.49, 30.58, 20.17, 14.70.

HRESI-MS m/z:

595.1986 ([Zn<sub>4</sub>C<sub>256</sub>H<sub>216</sub>N<sub>24</sub>O<sub>8</sub>(CF<sub>3</sub>SO<sub>3</sub>)<sub>1</sub>]<sup>7+</sup>calc), 595.2171 (Found);

719.3903 ([Zn<sub>4</sub>C<sub>256</sub>H<sub>216</sub>N<sub>24</sub>O<sub>8</sub>(CF<sub>3</sub>SO<sub>3</sub>)<sub>2</sub>]<sup>6+</sup>calc), 719.4120 (Found);

893.0589 ([Zn<sub>4</sub>C<sub>256</sub>H<sub>216</sub>N<sub>24</sub>O<sub>8</sub>(CF<sub>3</sub>SO<sub>3</sub>)<sub>3</sub>]<sup>5+</sup>calc), 893.0848 (Found);

1153.5618 ([Zn<sub>4</sub>C<sub>256</sub>H<sub>216</sub>N<sub>24</sub>O<sub>8</sub>(CF<sub>3</sub>SO<sub>3</sub>)<sub>4</sub>]<sup>4+</sup>calc), 1153.5941 (Found);

1587.7332 ([Zn<sub>4</sub>C<sub>256</sub>H<sub>216</sub>N<sub>24</sub>O<sub>8</sub>(CF<sub>3</sub>SO<sub>3</sub>)<sub>5</sub>]<sup>3+</sup>calc), 1587.7752 (Found);

2456.0706 ([Zn<sub>4</sub>C<sub>256</sub>H<sub>216</sub>N<sub>24</sub>O<sub>8</sub>(CF<sub>3</sub>SO<sub>3</sub>)<sub>6</sub>]<sup>2+</sup>calc), 2456.1407(Found).

**Cd<sub>4</sub>(L1)<sub>2</sub>(OTf)<sub>8</sub>**: Yield: 86%. <sup>1</sup>H NMR (400 MHz, 298 K, CD<sub>3</sub>CN, ppm):  $\sigma$  8.77 (s, 16H), 8.36 (d,  $J = 8.0$  Hz, 16H), 8.18 (d,  $J = 8.0$  Hz, 16H), 7.93 (d,  $J = 8.1$  Hz, 16H), 7.89 (s, 16H), 7.80 (d,  $J = 4.2$  Hz, 16H), 6.95 (t,  $J = 7.6$  Hz, 16H), 6.69 (t,  $J = 6.8$  Hz, 16H), 4.76 (d,  $J = 12.4$  Hz, 8H), 4.14 (t,  $J = 7.6$  Hz, 16H), 3.68 (d,  $J = 12.4$  Hz, 8H), 2.28-2.20 (m, 16H), 1.71-1.62 (m, 16H), 1.18 (t,  $J = 7.6$  Hz, 24H).

**Cd<sub>4</sub>(L1)<sub>2</sub>(PF<sub>6</sub>)<sub>8</sub>**: Yield: 80%. <sup>1</sup>H NMR (400 MHz, 298 K, CD<sub>3</sub>CN, ppm):  $\sigma$  8.74 (s, 16H), 8.33 (d,  $J = 8.0$  Hz, 16H), 8.15 (d,  $J = 8.0$  Hz, 16H), 7.94 (d,  $J = 8.0$  Hz, 16H), 7.92 (s, 16H), 7.76 (d,  $J = 4.2$  Hz, 16H), 6.89 (bs, 16H), 6.60 (bs, 16H), 4.76 (d,  $J = 12.4$  Hz, 8H), 4.13 (t,  $J = 7.6$  Hz, 16H), 3.68 (d,  $J = 12.4$  Hz, 8H), 2.27-2.16 (m, 16H), 1.71-1.61 (m, 16H), 1.17 (t,  $J = 7.6$  Hz, 24H). <sup>13</sup>C NMR (100 MHz, 298 K, CD<sub>3</sub>CN,

ppm):  $\sigma$  157.91, 155.75, 150.32, 150.23, 149.42, 143.27, 140.95, 137.38, 135.11, 129.43, 128.09, 127.85, 127.71, 124.19, 122.66, 77.02, 33.50, 30.53, 20.18, 14.70.

HRESI-MS m/z:

621.6152 ( $[\text{Cd}_4\text{C}_{256}\text{H}_{216}\text{N}_{24}\text{O}_8(\text{PF}_6)_1]^{7+}$  calc), 621.6106 (Found);

749.3785 ( $[\text{Cd}_4\text{C}_{256}\text{H}_{216}\text{N}_{24}\text{O}_8(\text{PF}_6)_2]^{6+}$  calc), 749.3725 (Found);

928.2472 ( $[\text{Cd}_4\text{C}_{256}\text{H}_{216}\text{N}_{24}\text{O}_8(\text{PF}_6)_3]^{5+}$  calc), 928.2389 (Found);

1196.5502 ( $[\text{Cd}_4\text{C}_{256}\text{H}_{216}\text{N}_{24}\text{O}_8(\text{PF}_6)_4]^{4+}$  calc), 1196.5390 (Found);

1643.7218 ( $[\text{Cd}_4\text{C}_{256}\text{H}_{216}\text{N}_{24}\text{O}_8(\text{PF}_6)_5]^{3+}$  calc), 1643.7033 (Found);

2538.0605 ( $[\text{Cd}_4\text{C}_{256}\text{H}_{216}\text{N}_{24}\text{O}_8(\text{PF}_6)_6]^{2+}$  calc), 2538.0354 (Found).

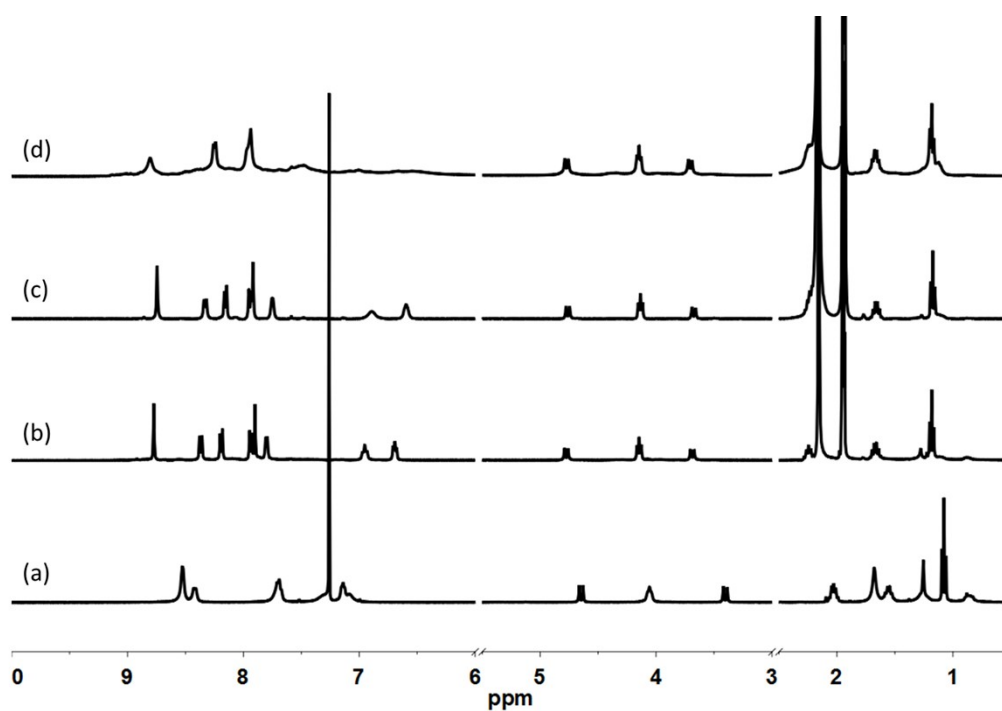

**Figure S1** <sup>1</sup>H NMR spectra (400 MHz, 298 K) of (a) ligand **L1** (CDCl<sub>3</sub>), (b) **Cd<sub>4</sub>(L1)<sub>2</sub>(PF<sub>6</sub>)<sub>8</sub>** MOC (CD<sub>3</sub>CN), (c) **Cd<sub>4</sub>(L1)<sub>2</sub>(OTf)<sub>8</sub>** MOC (CD<sub>3</sub>CN), and (d) **Zn<sub>4</sub>(L1)<sub>2</sub>(OTf)<sub>8</sub>** MOC (CD<sub>3</sub>CN).

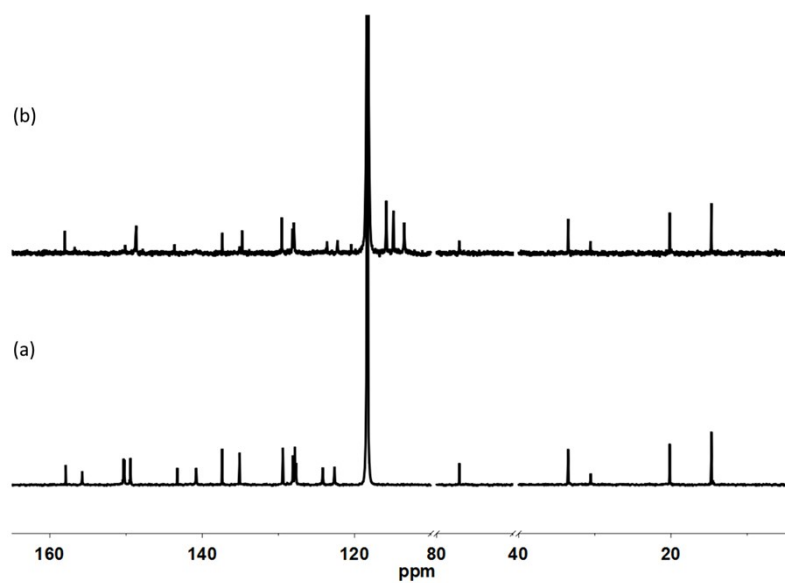

**Figure S2**  $^{13}\text{C}$  NMR spectra (100 MHz,  $\text{CD}_3\text{CN}$ , 298 K) of (a)  $\text{Cd}_4(\text{L1})_2(\text{PF}_6)_8$  MOC and (b)  $\text{Zn}_4(\text{L1})_2(\text{OTf})_8$  MOC.

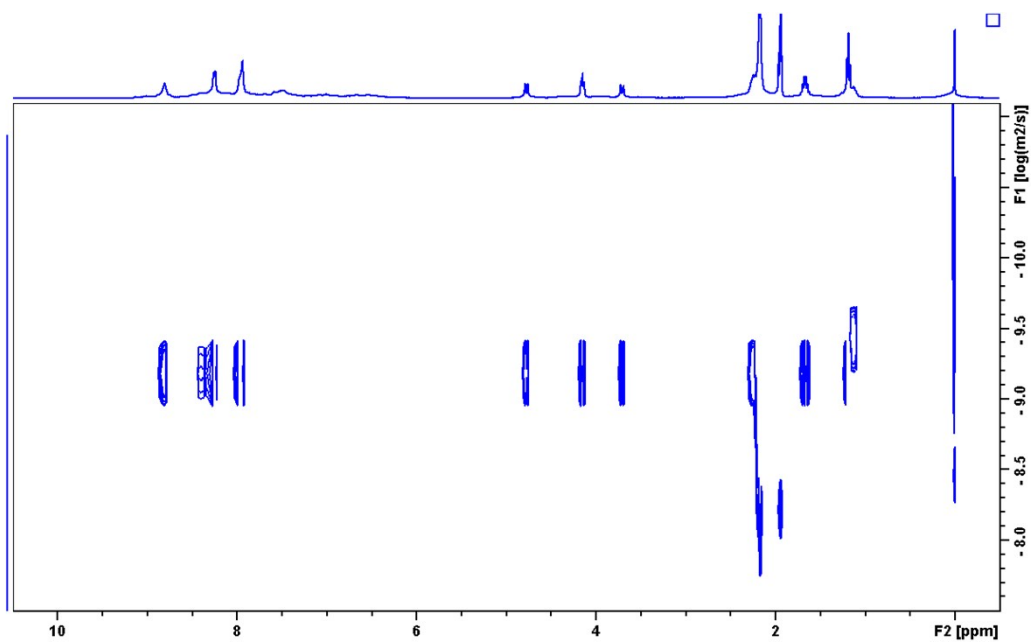

**Figure S3**  $^1\text{H}$  DOSY spectrum (400 MHz,  $\text{CD}_3\text{CN}$ , 298 K) of  $\text{Zn}_4(\text{L1})_2(\text{OTf})_8$  MOC.

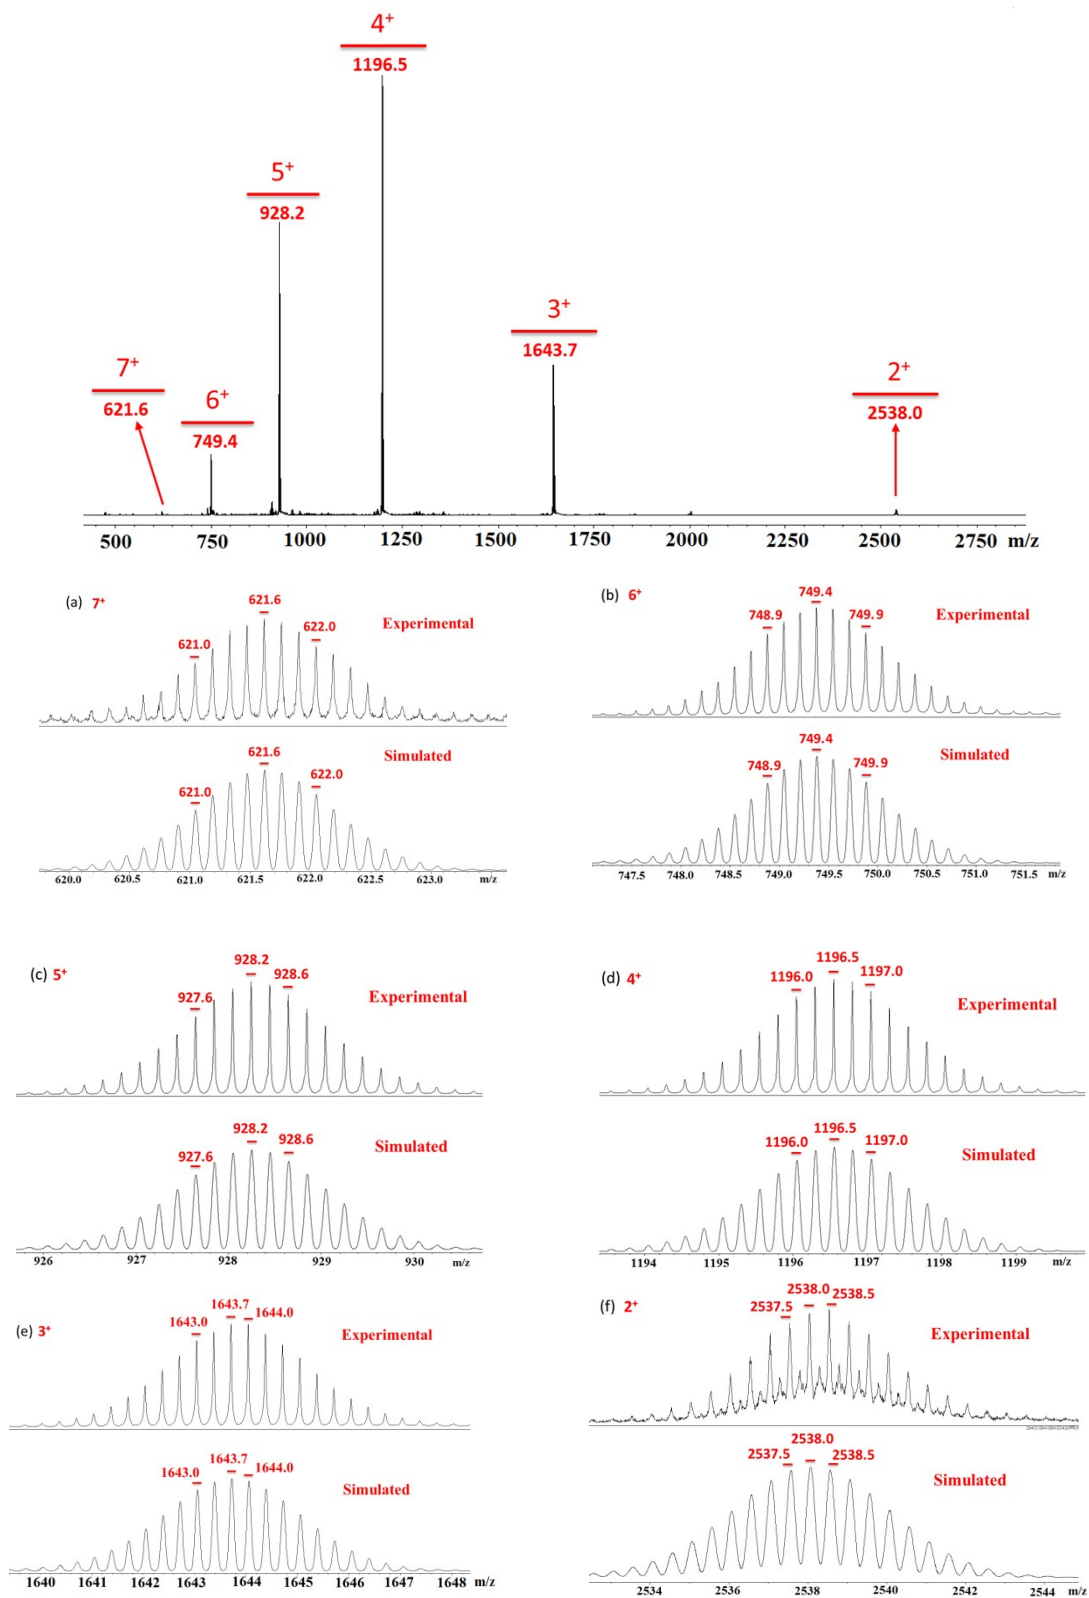

**Figure S4** ESI-MS spectrum of  $\text{Cd}_4(\text{L1})_2(\text{BF}_6)_8$  MOC and the isotope pattern of (a)  $7^+$ , (b)  $6^+$ , (c)  $5^+$ , (d)  $4^+$ , (e)  $3^+$  and (f)  $2^+$  peak with the corresponding simulated isotope pattern.



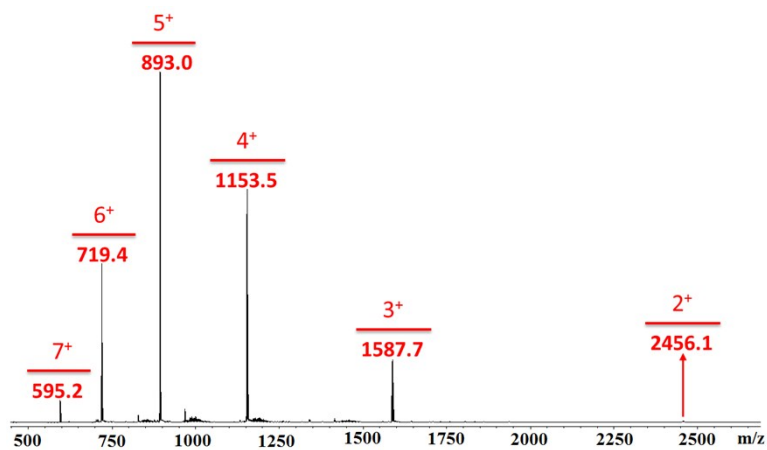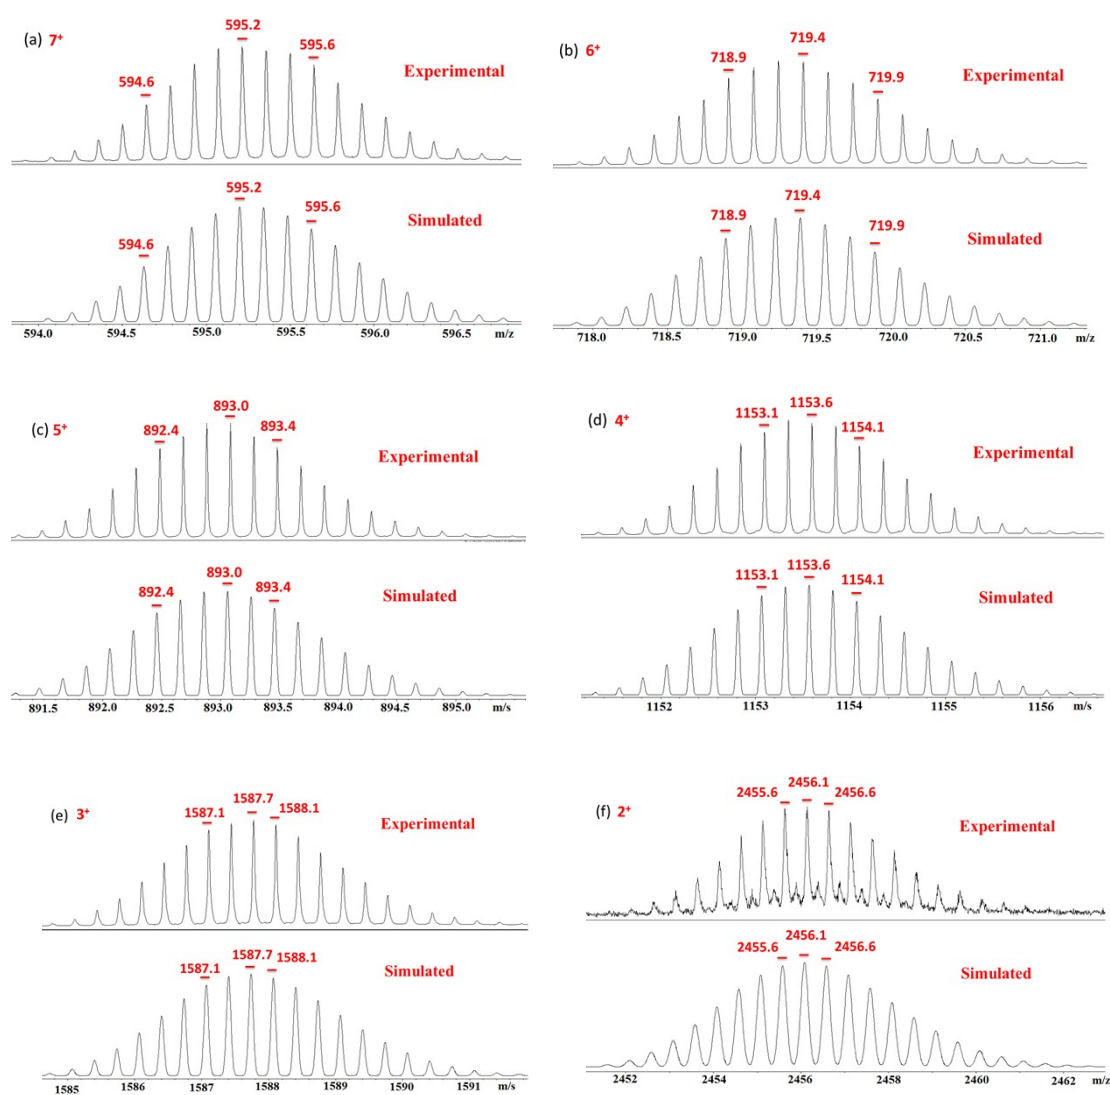

**Figure S5** ESI-MS spectrum of  $\text{Zn}_4(\text{L1})_2(\text{OTf})_8$  MOC and the isotope pattern of (a) 7<sup>+</sup>, (b) 6<sup>+</sup>, (c) 5<sup>+</sup>, (d) 4<sup>+</sup>, (e) 3<sup>+</sup> and (f) 2<sup>+</sup> peak with the corresponding simulated isotope pattern.

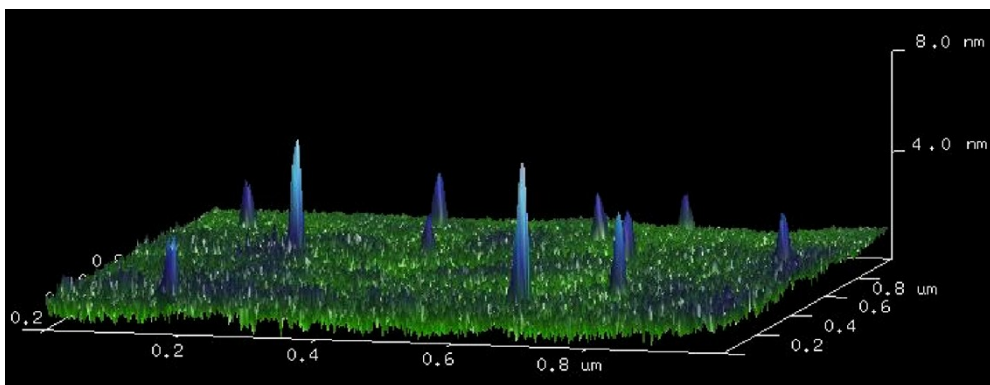

**Figure S6** AFM image of  $\text{Zn}_4(\text{L1})_2(\text{OTf})_8$  MOC on mica surface.

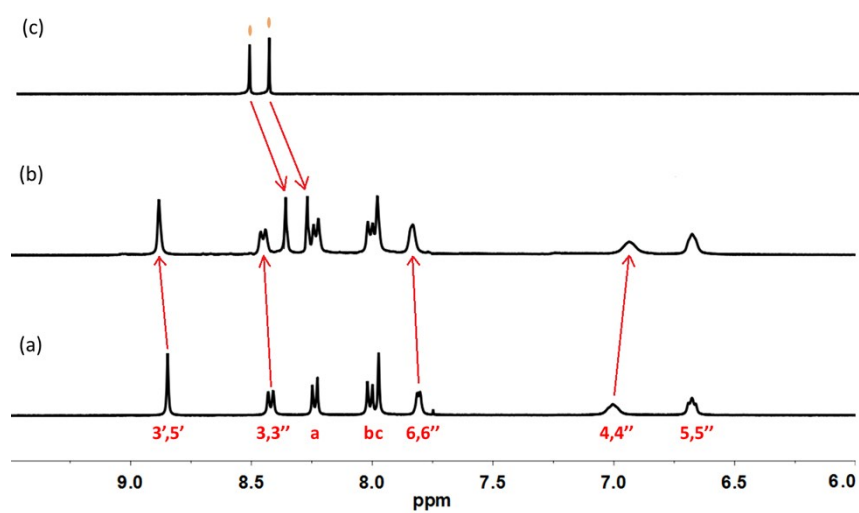

**Figure S7**  $^1\text{H}$  NMR (400 MHz, 298 K) ( $\text{CD}_3\text{CN} : \text{D}_2\text{O} = 2:1$ , v/v) study of (a) free  $\text{Cd}_4(\text{L1})_2(\text{PF}_6)_8$  MOC, (b) mercaptopurine@ $\text{Cd}_4(\text{L1})_2(\text{PF}_6)_8$  MOC system at RT, and (c) free mercaptopurine.

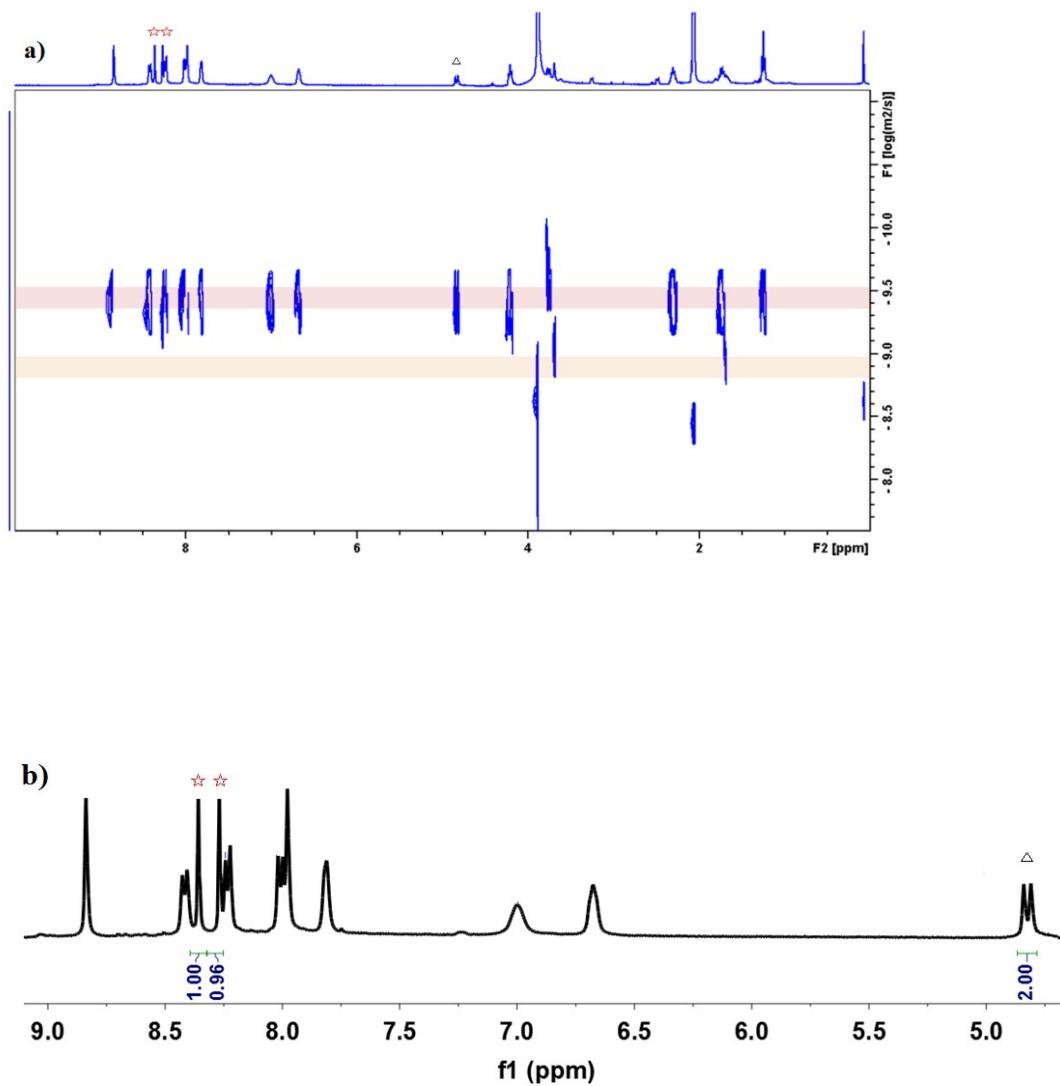

**Figure S8** a)  $^1\text{H}$  DOSY spectrum (400 MHz, 298 K) and b) integration of the guest peaks in  $^1\text{H}$  DOSY spectrum of mercaptopurine@ $\text{Cd}_4(\text{L1})_2(\text{PF}_6)_8$  MOC system at RT in the solvent mixture of  $\text{CD}_3\text{CN}$  and  $\text{D}_2\text{O}$  (2:1 v/v). Red star: H Peaks from mercaptopurine; Black triangle: H Peaks from bridging methylene groups in calixarene.

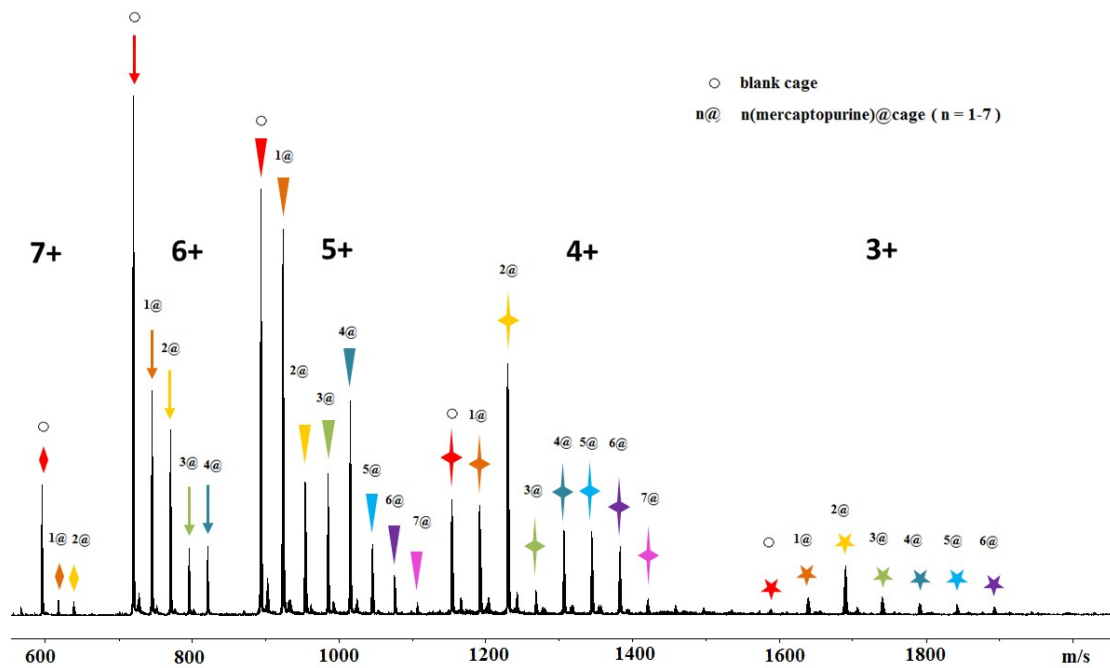

(a) Blank  $Zn_4(L1)_2$

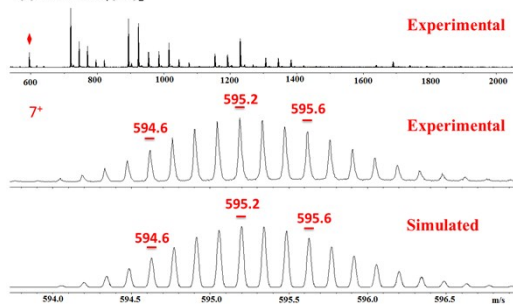

(b) 1(mercaptopurine)@ $Zn_4(L1)_2$

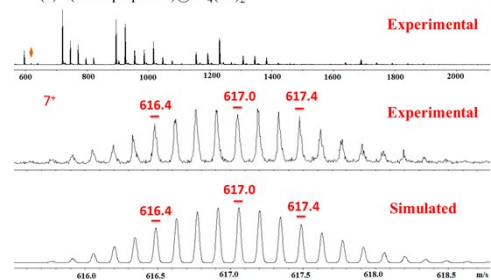

(c) 2(mercaptopurine)@ $Zn_4(L1)_2$

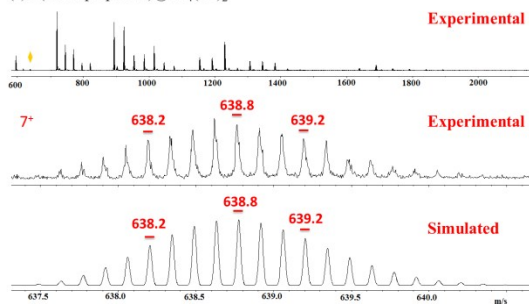

(d) Blank  $Zn_4(L1)_2$

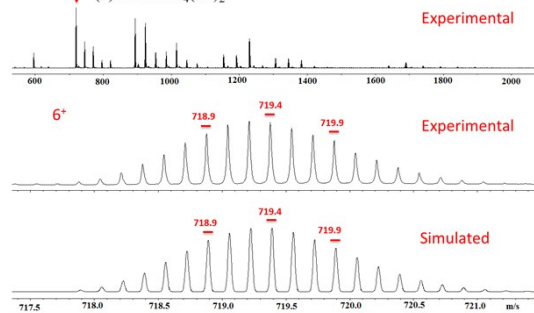

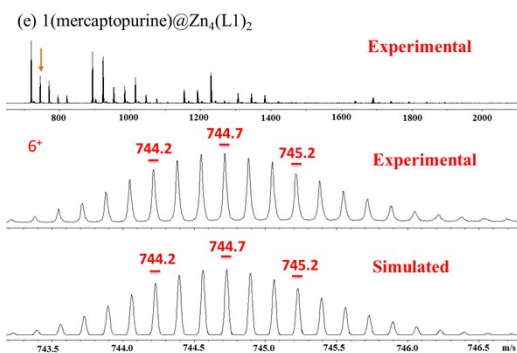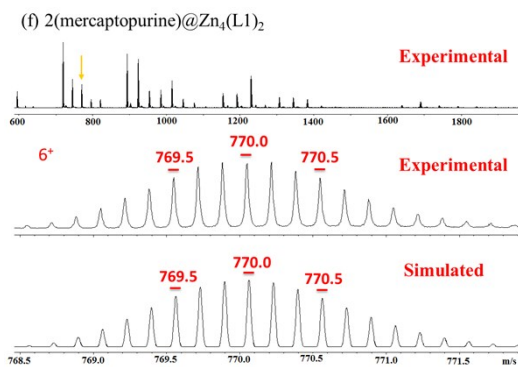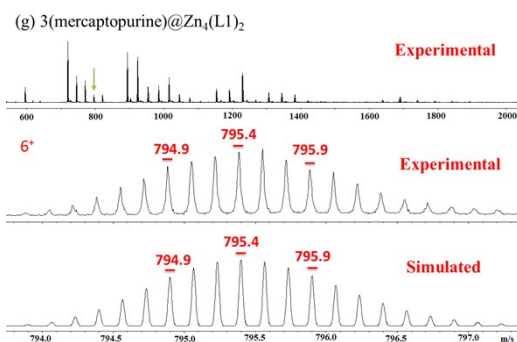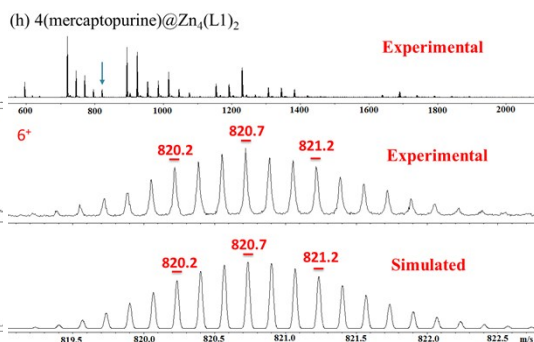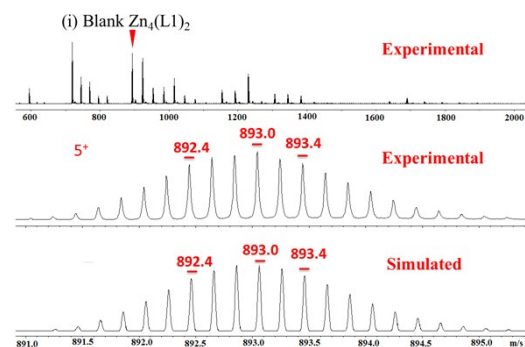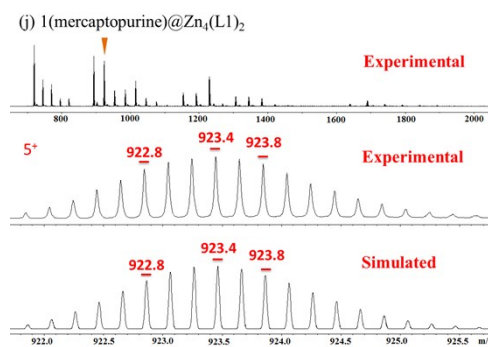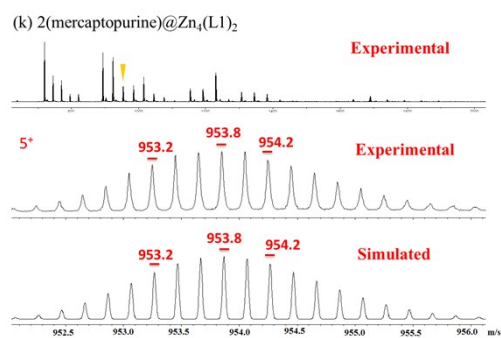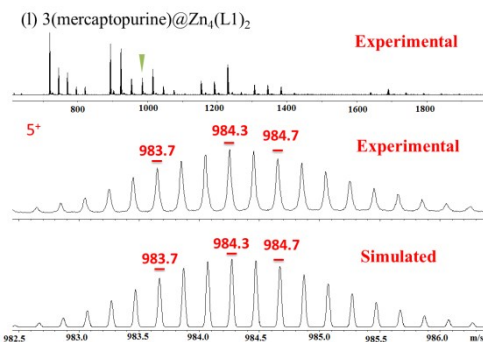

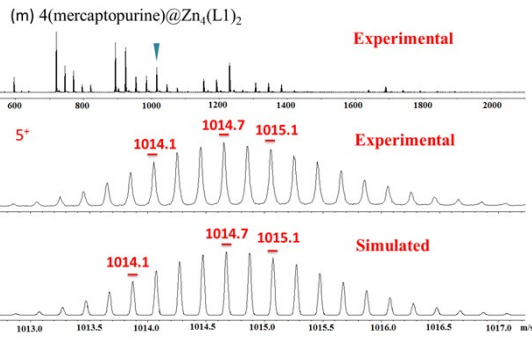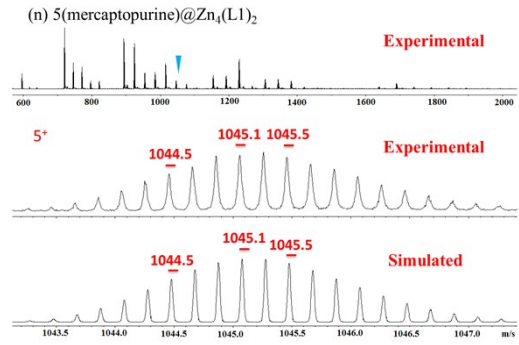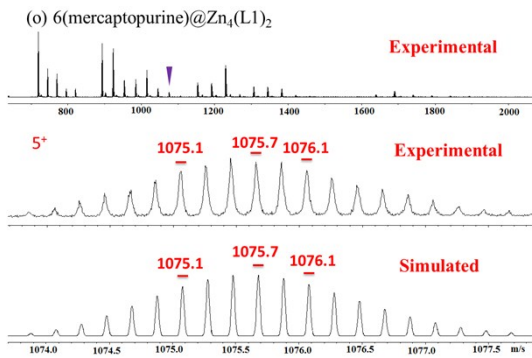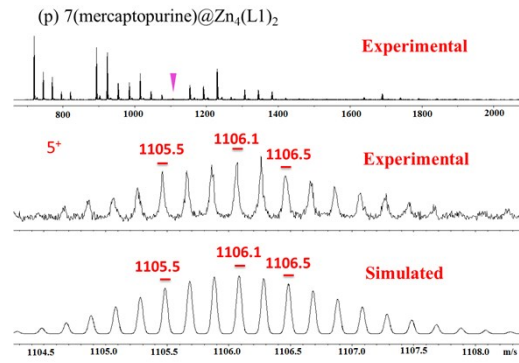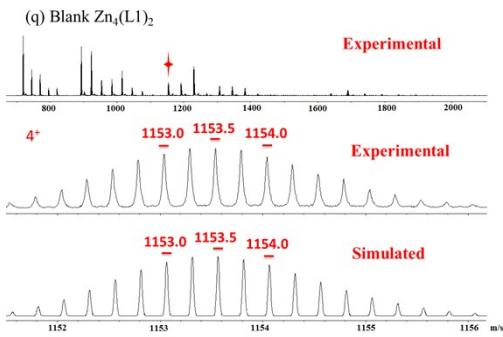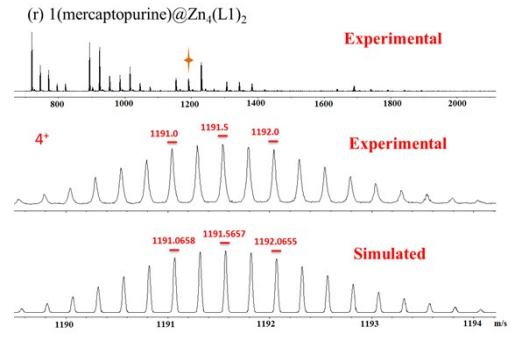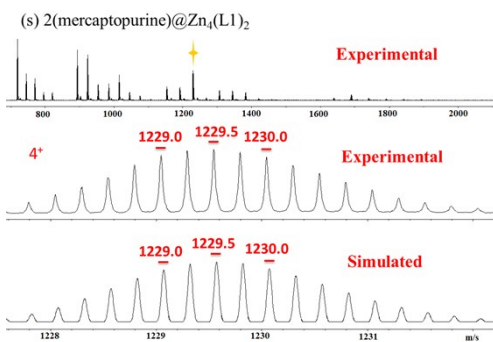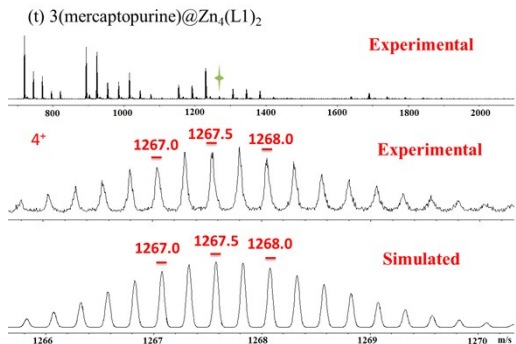

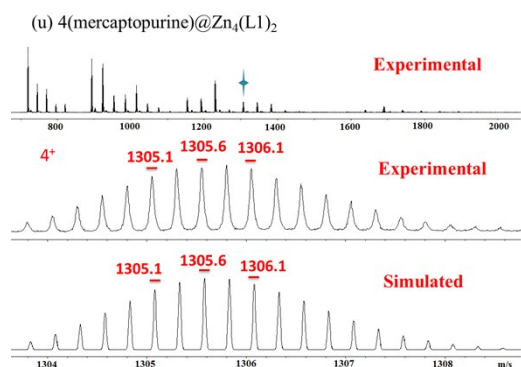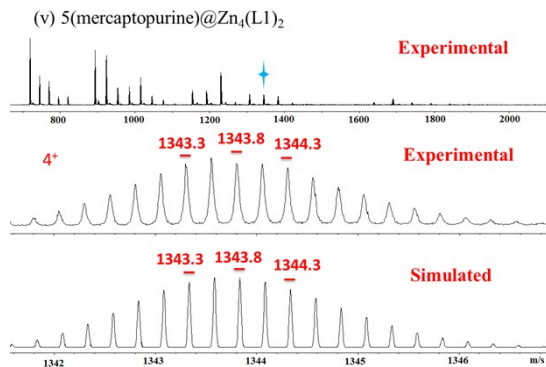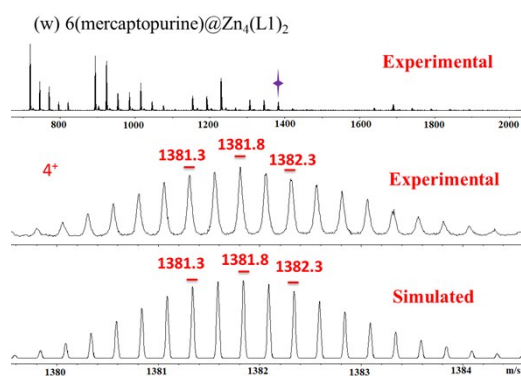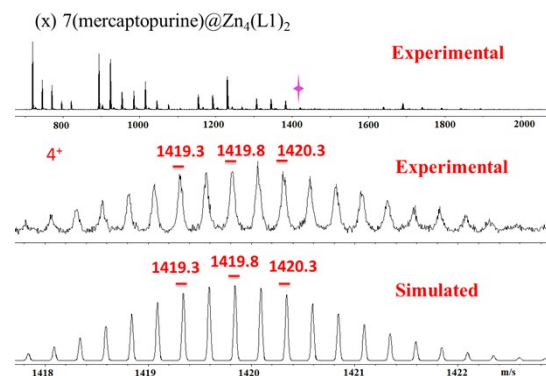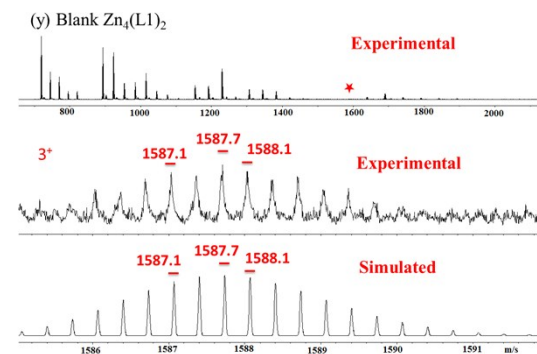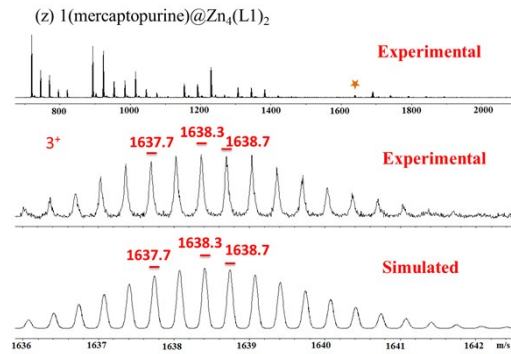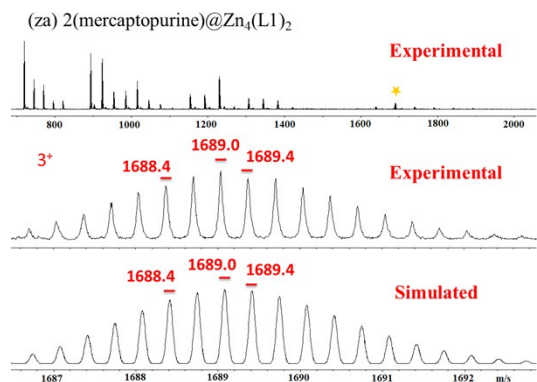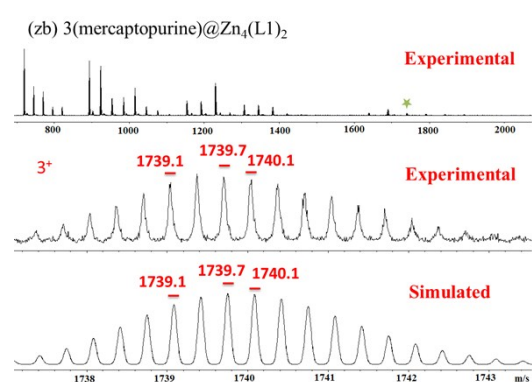

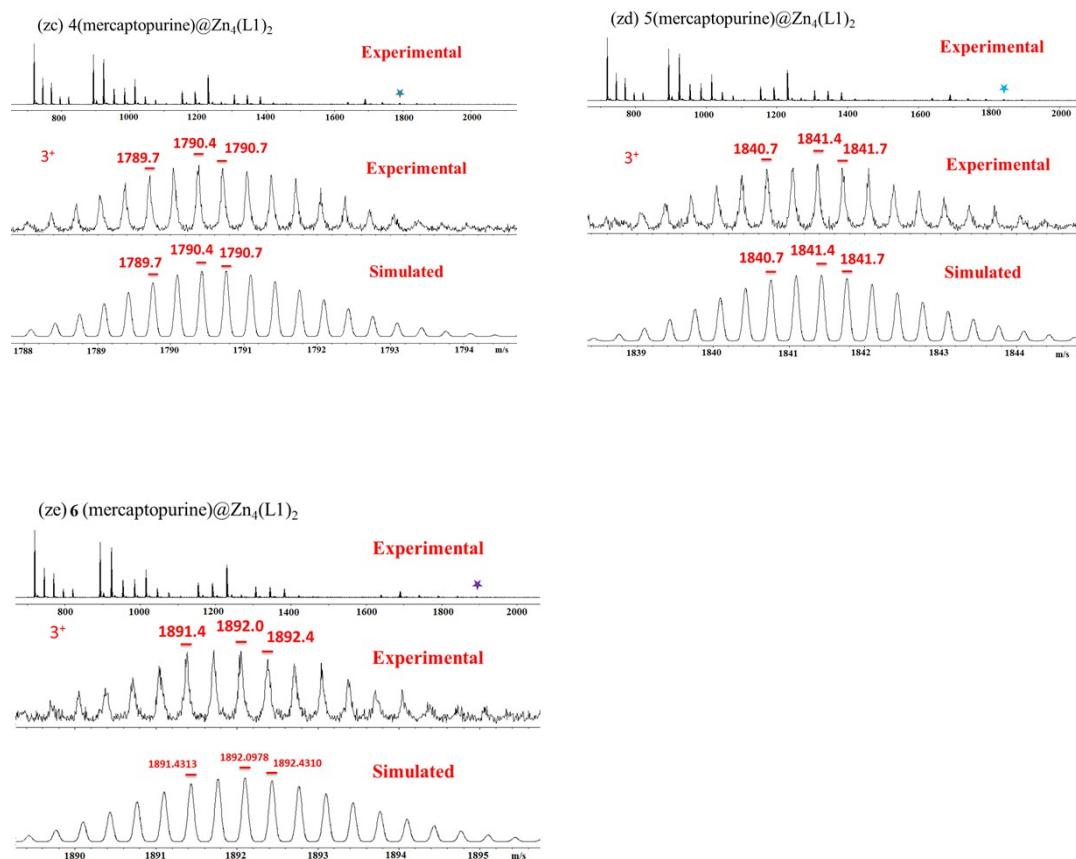

**Figure S9** ESI-MS study of mercaptopurine@Zn<sub>4</sub>(L1)<sub>2</sub>(OTf)<sub>8</sub> MOC. Rhombus, arrow, triangle, quadrangle and pentagram represent 7+, 6+, 5+, 4+, and 3+ peaks, respectively. Red, orange, gold, forestgreen, prasinous, skyblue, purple and fuchsia represent blank Zn<sub>4</sub>(L1)<sub>2</sub>(OTf)<sub>8</sub> [(a), (d), (i), (q) and (y)], 1(mercaptopurine)@Zn<sub>4</sub>(L1)<sub>2</sub>(OTf)<sub>8</sub> [(b), (e), (j), (r) and (z)], 2(mercaptopurine)@Zn<sub>4</sub>(L1)<sub>2</sub>(OTf)<sub>8</sub> [(c), (f), (k), (s), and (za)], 3(mercaptopurine)@Zn<sub>4</sub>(L1)<sub>2</sub>(OTf)<sub>8</sub> [(g), (l), (t), and (zb)], 4(mercaptopurine)@Zn<sub>4</sub>(L1)<sub>2</sub>(OTf)<sub>8</sub> [(h), (m), (u), and (zc)], 5(mercaptopurine)@Zn<sub>4</sub>(L1)<sub>2</sub>(OTf)<sub>8</sub> [(n), (v), and (zd)], 6(mercaptopurine)@Zn<sub>4</sub>(L1)<sub>2</sub>(OTf)<sub>8</sub> [(o), (w), and (ze)], and 7(mercaptopurine)@Zn<sub>4</sub>(L1)<sub>2</sub>(OTf)<sub>8</sub> [(p) and (x)], respectively.



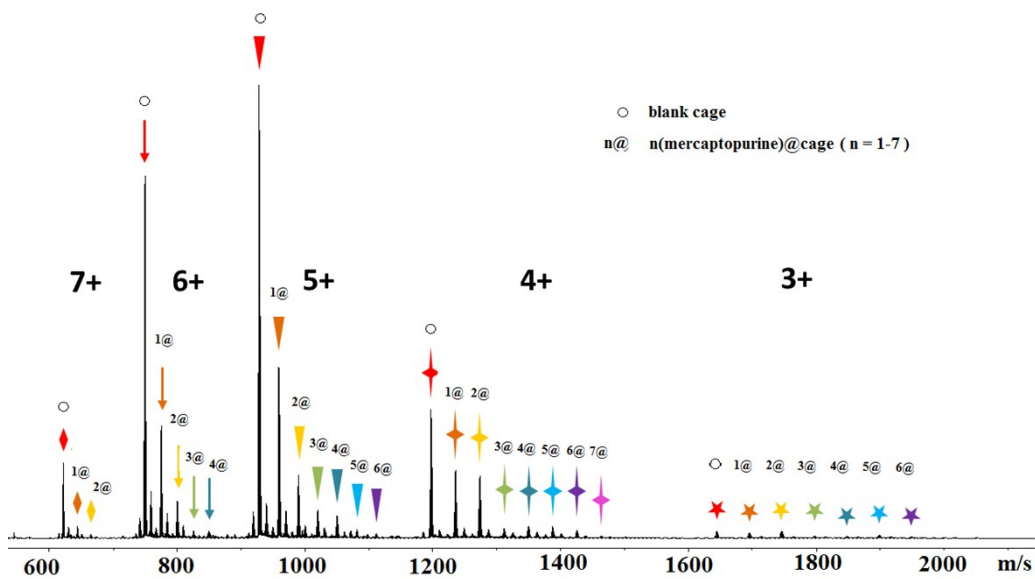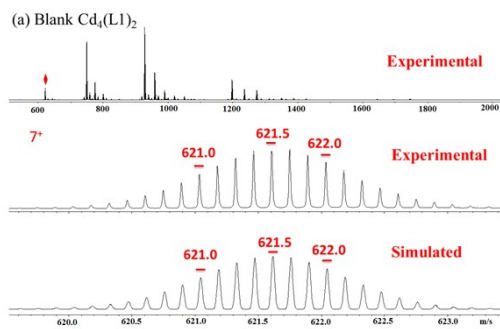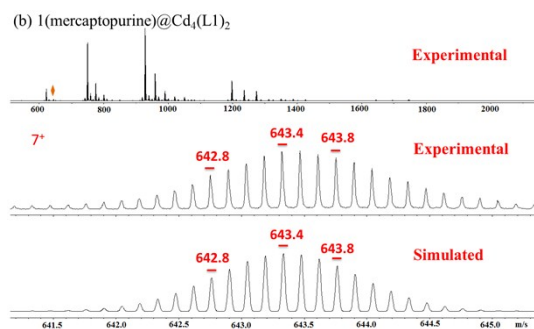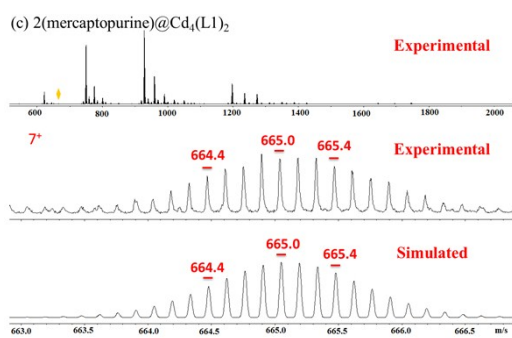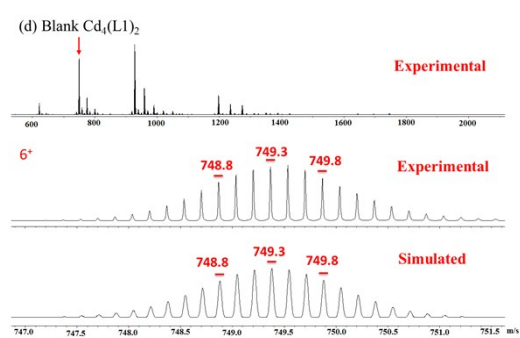

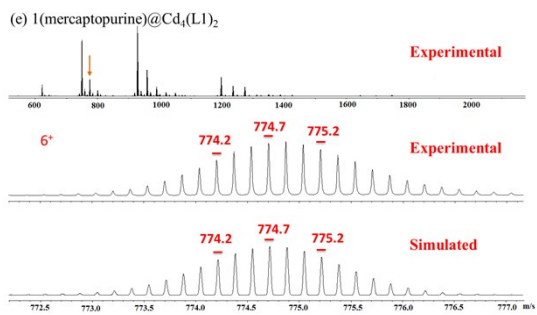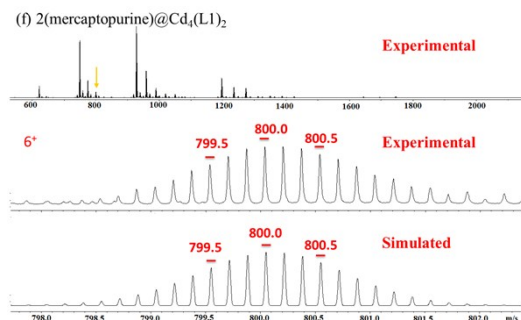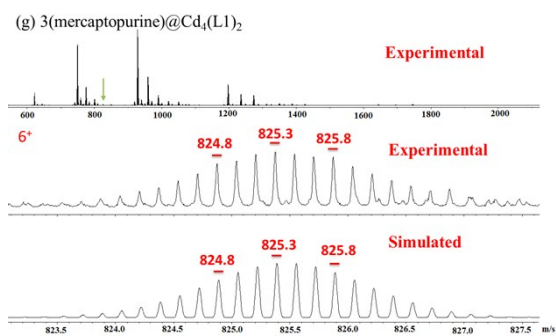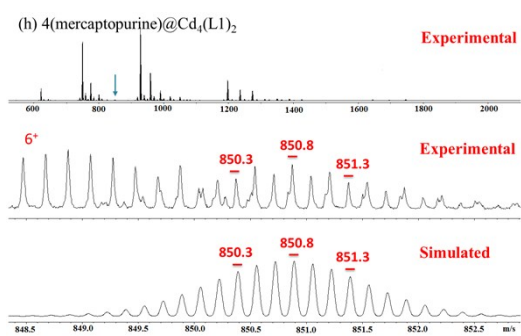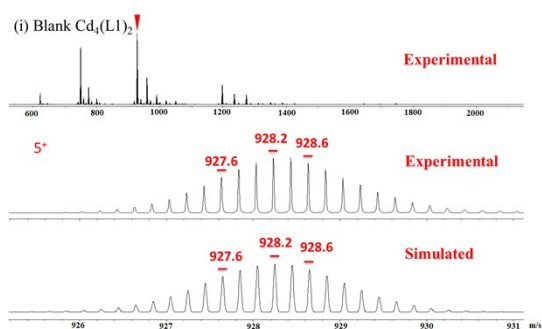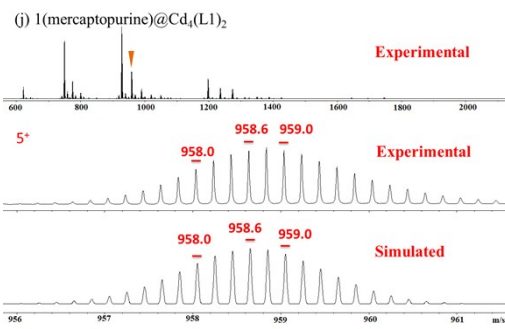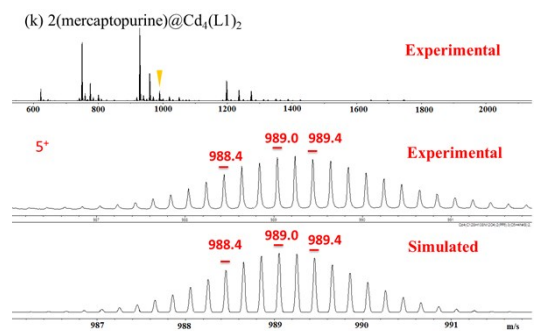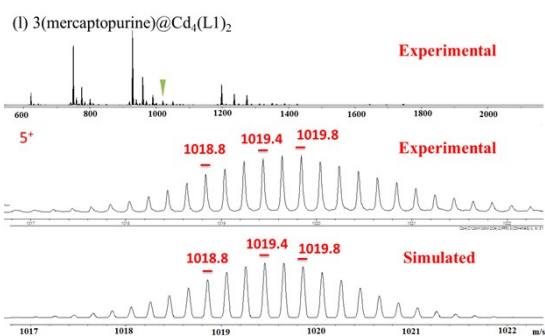

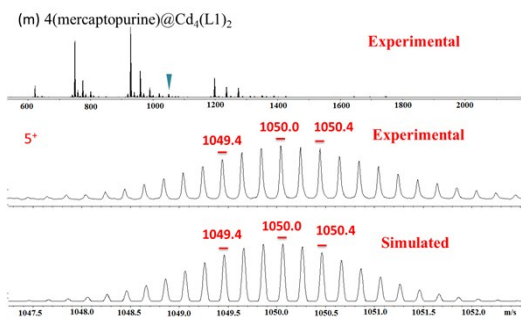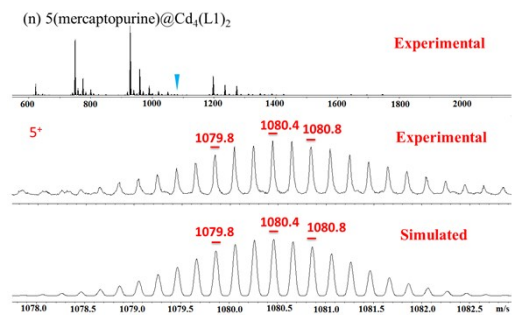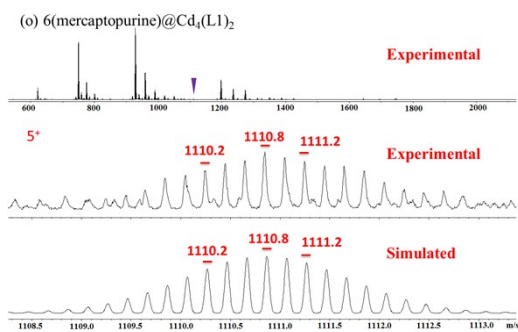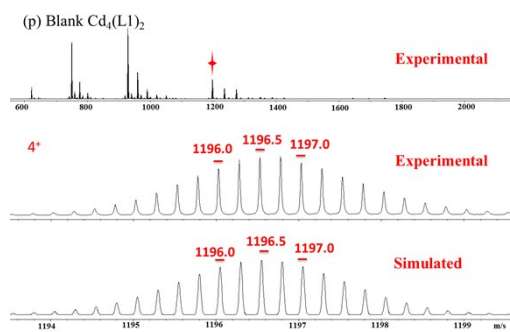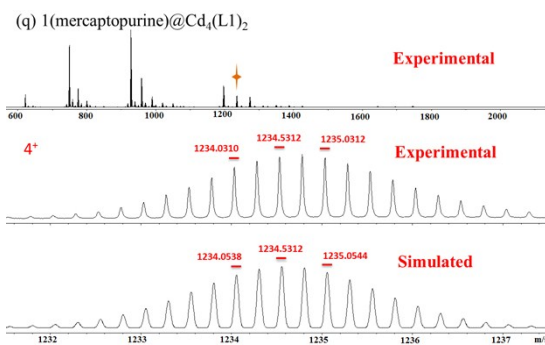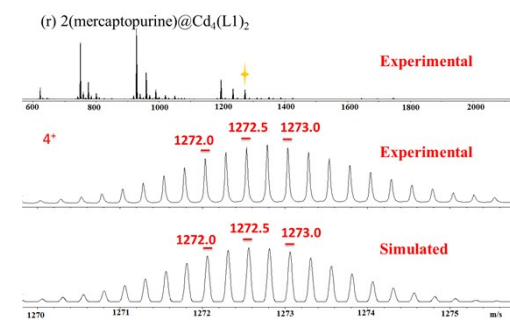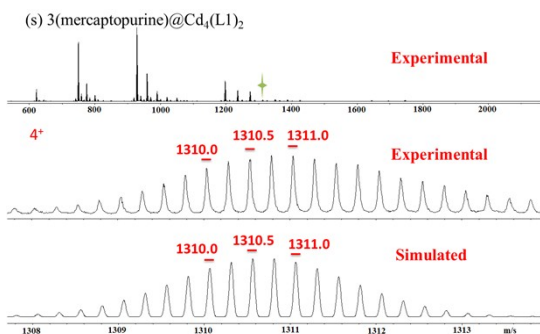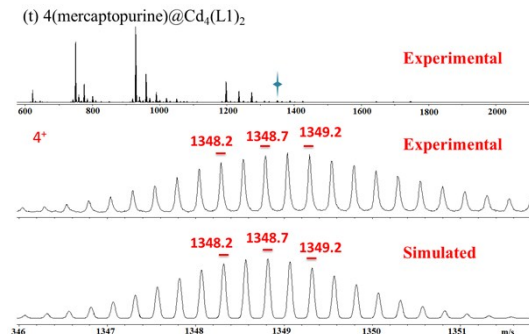

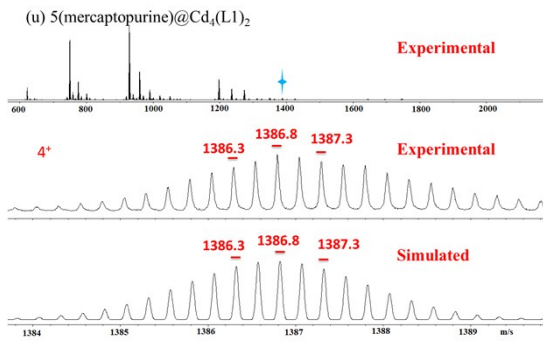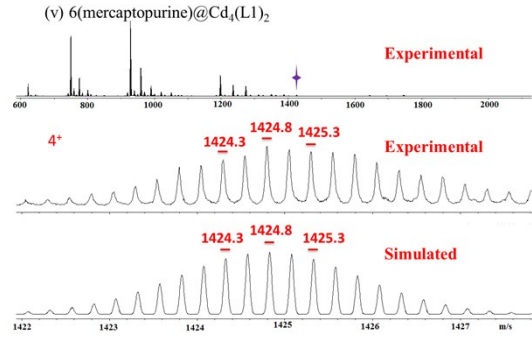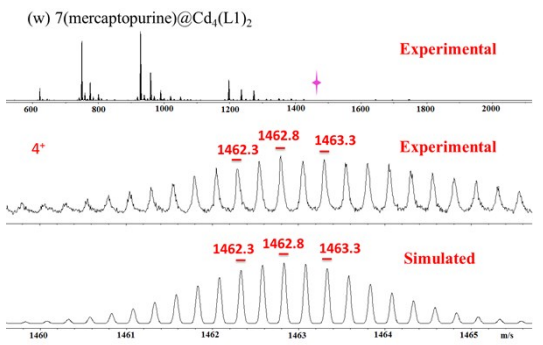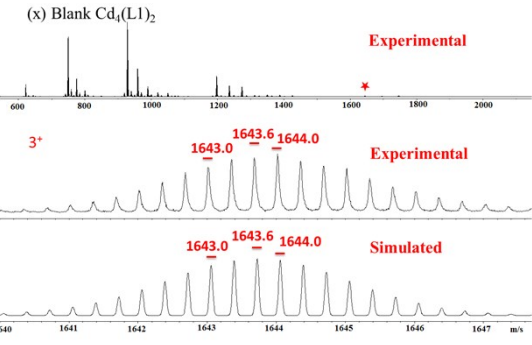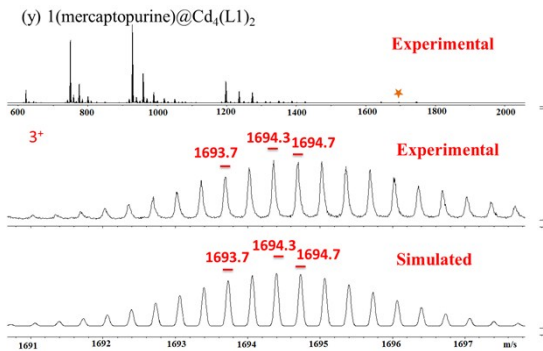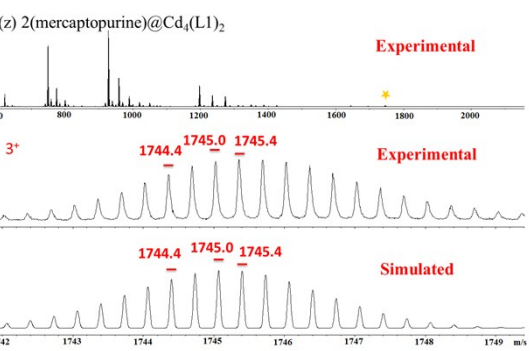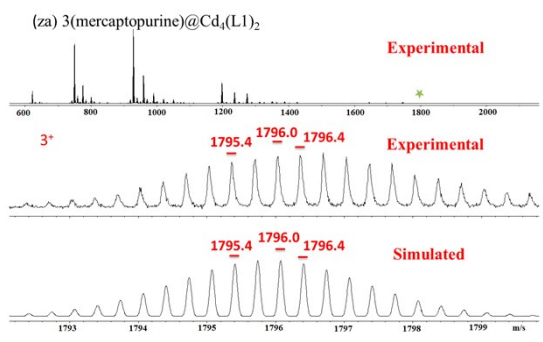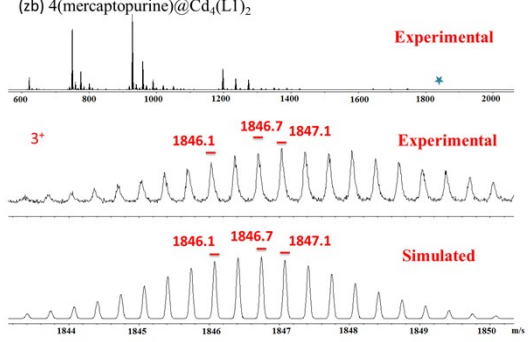

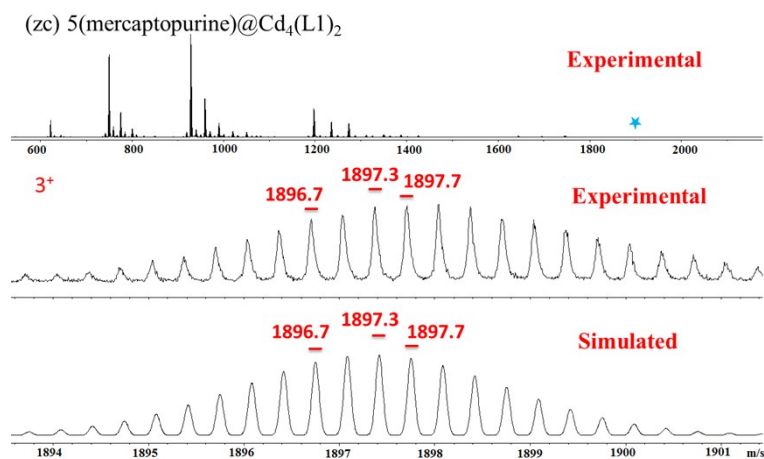

**Figure S10** ESI-MS study of mercaptapurine@Cd<sub>4</sub>(L1)<sub>2</sub>(PF<sub>6</sub>)<sub>8</sub> MOC. Rhombus, arrow, triangle, quadrangle and pentagram represent 7+, 6+, 5+, 4+, and 3+ peaks, respectively. Red, orange, gold, forestgreen, prasinous, skyblue, purple and fuchsia represent blank Cd<sub>4</sub>(L1)<sub>2</sub>(PF<sub>6</sub>)<sub>8</sub> [(a), (d), (i), (p) and (x)], 1(mercaptapurine)@Cd<sub>4</sub>(L1)<sub>2</sub>(PF<sub>6</sub>)<sub>8</sub> [(b), (e), (j), (q) and (y)], 2(mercaptapurine)@Cd<sub>4</sub>(L1)<sub>2</sub>(PF<sub>6</sub>)<sub>8</sub> [(c), (f), (k), (r), and (z)], 3(mercaptapurine)@Cd<sub>4</sub>(L1)<sub>2</sub>(PF<sub>6</sub>)<sub>8</sub> [(g), (l), (s), and (za)], 4(mercaptapurine)@Cd<sub>4</sub>(L1)<sub>2</sub>(PF<sub>6</sub>)<sub>8</sub> [(h), (m), (t), and (zb)], 5(mercaptapurine)@Cd<sub>4</sub>(L1)<sub>2</sub>(PF<sub>6</sub>)<sub>8</sub> [(m), (u), and (zc)], 6(mercaptapurine)@Cd<sub>4</sub>(L1)<sub>2</sub>(PF<sub>6</sub>)<sub>8</sub> [(o) and (v)], and 7(mercaptapurine)@Cd<sub>4</sub>(L1)<sub>2</sub>(PF<sub>6</sub>)<sub>8</sub> [(w)], respectively.

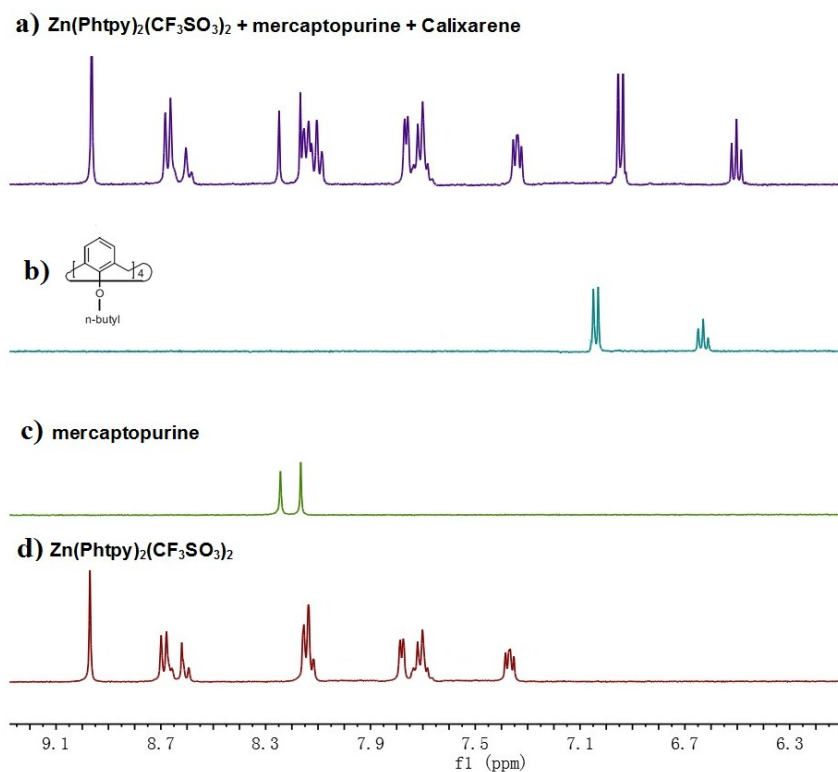

**Figure S11**  $^1\text{H}$  NMR spectra (400 MHz, 298 K) of a) the mixture, b) 25,26,27,28-tetrabutoxycalix[4]arene, c) mercaptopurine, and d)  $\text{Zn}(\text{phenyl-tpy})_2(\text{CF}_3\text{SO}_3)_2$  in  $\text{CD}_3\text{CN}$  and  $\text{D}_2\text{O}$  (v:v = 2:1).

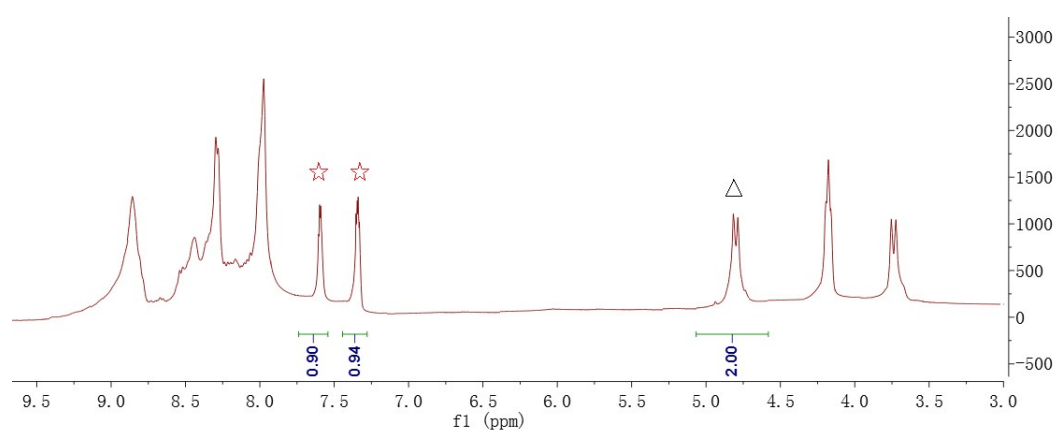

**Figure S12**  $^1\text{H}$  NMR of mercaptopurine@ $\text{Zn}_4\text{L}_2$  cages. Red star: H Peaks from mercaptopurine; Black triangle: H Peaks from bridging methylene groups in calixarene.

**Table S1.** Cartesian coordinates of  $\text{Zn}_4\text{L}_2$  cages from B3LYP/6-31Gd optimization.

| atom  | x      | y      | z      | atom  | x      | y      | z      |
|-------|--------|--------|--------|-------|--------|--------|--------|
| C(1)  | 1.015  | 6.184  | -8.789 | C(41) | 11.668 | -2.993 | 1.670  |
| C(2)  | 2.610  | 5.018  | -7.551 | C(42) | 12.354 | -3.760 | 0.540  |
| C(3)  | 2.851  | 4.139  | -6.373 | C(43) | 11.832 | -3.343 | -0.834 |
| C(4)  | 3.626  | 5.467  | -8.399 | C(44) | 12.097 | 3.336  | -0.338 |
| C(5)  | 3.302  | 6.300  | -9.468 | C(45) | 10.446 | 2.103  | 3.462  |
| N(6)  | 1.325  | 5.377  | -7.762 | C(46) | 10.140 | -3.534 | -2.599 |
| C(7)  | 1.975  | 6.671  | -9.669 | C(47) | 12.508 | -0.653 | -3.505 |
| C(8)  | 4.134  | 3.763  | -5.979 | C(48) | 10.810 | -2.524 | -3.309 |
| C(9)  | 3.162  | 2.578  | -4.146 | C(49) | 12.466 | -2.328 | -1.575 |
| C(10) | 4.315  | 2.984  | -4.828 | C(50) | 11.941 | -1.883 | -2.802 |
| N(11) | 1.752  | 3.745  | -5.689 | C(51) | 14.564 | 1.926  | -2.927 |
| C(12) | 1.900  | 2.962  | -4.603 | C(52) | 14.674 | 3.449  | -2.987 |
| N(13) | -0.398 | 3.364  | -4.026 | C(53) | 14.557 | 1.598  | 1.964  |
| C(14) | -1.517 | 3.065  | -3.354 | C(54) | 15.228 | 2.875  | 1.458  |
| C(15) | 0.632  | 1.410  | -3.073 | C(55) | 14.841 | -2.268 | -1.516 |
| C(16) | 0.668  | 2.559  | -3.874 | C(56) | 15.962 | -1.432 | -0.914 |
| C(17) | -1.637 | 1.957  | -2.515 | C(57) | 14.497 | -2.719 | 2.815  |
| C(18) | -0.541 | 1.106  | -2.385 | C(58) | 14.762 | -2.498 | 4.305  |
| C(19) | 12.114 | 0.228  | 3.731  | C(59) | 15.577 | 3.945  | -4.130 |
| C(20) | 11.592 | 1.457  | 2.993  | C(60) | 15.691 | -1.322 | 4.650  |
| O(21) | 13.589 | -1.717 | -1.064 | C(61) | 17.370 | -1.937 | -1.268 |
| O(22) | 13.307 | 1.304  | 1.302  | C(62) | 6.709  | 2.323  | -5.219 |
| C(23) | 12.348 | 1.518  | -2.132 | C(63) | 7.983  | 2.033  | -4.743 |
| O(24) | 13.648 | -1.704 | 2.222  | C(64) | 5.947  | 2.658  | -2.955 |
| C(25) | 9.826  | 3.147  | 2.755  | C(65) | 5.667  | 2.642  | -4.332 |
| C(26) | 10.401 | 3.527  | 1.531  | C(66) | 8.276  | 2.075  | -3.368 |
| C(27) | 11.560 | 2.928  | 1.030  | C(67) | 7.228  | 2.392  | -2.484 |
| C(28) | 11.548 | 2.469  | -1.467 | C(68) | 0.668  | 9.878  | 3.594  |
| C(29) | 10.212 | 2.605  | -1.855 | C(69) | 2.557  | 8.575  | 3.964  |
| C(30) | 9.654  | 1.826  | -2.878 | C(70) | 3.057  | 7.212  | 4.290  |
| C(31) | 10.444 | 0.807  | -3.430 | C(71) | 3.392  | 9.671  | 3.742  |
| C(32) | 11.769 | 0.603  | -3.039 | C(72) | 2.822  | 10.906 | 3.434  |
| C(33) | 9.614  | -2.576 | 2.945  | N(73) | 1.211  | 8.690  | 3.895  |
| C(34) | 10.205 | -1.407 | 3.449  | C(74) | 1.436  | 11.015 | 3.355  |
| C(35) | 11.532 | -1.067 | 3.172  | C(75) | 4.379  | 6.800  | 4.119  |
| C(36) | 10.356 | -3.322 | 2.016  | C(76) | 3.724  | 4.622  | 4.878  |
| C(37) | 12.175 | 1.912  | 1.792  | C(77) | 4.733  | 5.459  | 4.366  |
| C(38) | 10.673 | -3.922 | -1.359 | N(78) | 2.110  | 6.366  | 4.724  |
| O(39) | 13.701 | 1.463  | -1.864 | C(79) | 2.435  | 5.112  | 5.066  |
| C(40) | 12.293 | -1.926 | 2.355  | N(80) | 0.081  | 4.825  | 5.438  |

| atom   | x      | y       | z      | atom   | x      | y       | z       |
|--------|--------|---------|--------|--------|--------|---------|---------|
| C(81)  | -0.967 | 4.178   | 5.961  | C(121) | 1.001  | -10.576 | -3.166  |
| C(82)  | 1.526  | 3.148   | 6.373  | C(122) | 4.396  | -6.725  | -3.964  |
| C(83)  | 1.316  | 4.316   | 5.635  | C(123) | 3.998  | -4.513  | -4.799  |
| C(84)  | -0.846 | 3.009   | 6.710  | C(124) | 4.897  | -5.438  | -4.240  |
| C(85)  | 0.428  | 2.488   | 6.921  | N(125) | 2.213  | -6.080  | -4.685  |
| C(86)  | 6.955  | 5.610   | 3.185  | C(126) | 2.675  | -4.873  | -5.038  |
| C(87)  | 8.173  | 5.058   | 2.804  | C(127) | -0.561 | -3.662  | -6.181  |
| C(88)  | 6.504  | 3.677   | 4.533  | C(128) | 2.026  | -2.806  | -6.348  |
| C(89)  | 6.077  | 4.926   | 4.047  | C(129) | 1.671  | -3.977  | -5.672  |
| C(90)  | 8.576  | 3.783   | 3.243  | C(130) | -0.294 | -2.485  | -6.879  |
| C(91)  | 7.713  | 3.119   | 4.136  | C(131) | 1.026  | -2.050  | -6.958  |
| C(92)  | 0.506  | -4.410  | 9.453  | C(132) | 7.078  | -5.767  | -3.005  |
| C(93)  | 2.365  | -4.533  | 8.066  | C(133) | 8.339  | -5.318  | -2.625  |
| C(94)  | 2.833  | -4.674  | 6.662  | C(134) | 6.827  | -3.848  | -4.426  |
| C(95)  | 3.225  | -4.388  | 9.155  | C(135) | 6.281  | -5.034  | -3.905  |
| C(96)  | 2.683  | -4.247  | 10.432 | C(136) | 8.859  | -4.097  | -3.097  |
| C(97)  | 1.299  | -4.252  | 10.587 | C(137) | 8.071  | -3.386  | -4.022  |
| C(98)  | 4.124  | -4.368  | 6.238  | C(138) | 17.059 | 3.579   | -3.975  |
| C(99)  | 3.439  | -4.886  | 3.997  | C(139) | 17.151 | -1.535  | 4.233   |
| C(100) | 4.441  | -4.423  | 4.868  | C(140) | 17.733 | -1.823  | -2.754  |
| N(101) | 1.887  | -5.071  | 5.797  | C(141) | 16.560 | 3.175   | 2.167   |
| C(102) | 2.182  | -5.225  | 4.498  | C(142) | 17.683 | 2.175   | 1.862   |
| N(103) | -0.156 | -5.701  | 4.238  | N(143) | 0.390  | -4.392  | -5.589  |
| C(104) | -1.199 | -6.194  | 3.560  | N(144) | 1.023  | -4.550  | 8.224   |
| C(105) | 1.268  | -6.304  | 2.399  | H(145) | -0.034 | 6.439   | -8.897  |
| C(106) | 1.067  | -5.749  | 3.665  | H(146) | 4.656  | 5.176   | -8.240  |
| C(107) | -1.085 | -6.761  | 2.291  | H(147) | 4.083  | 6.655   | -10.132 |
| C(108) | 0.175  | -6.817  | 1.703  | H(148) | 1.683  | 7.321   | -10.486 |
| C(109) | 6.537  | -3.064  | 5.117  | H(149) | 5.000  | 4.116   | -6.522  |
| C(110) | 7.767  | -2.617  | 4.651  | H(150) | 3.248  | 1.974   | -3.252  |
| C(111) | 6.263  | -4.381  | 3.125  | H(151) | -2.354 | 3.742   | -3.491  |
| C(112) | 5.756  | -3.964  | 4.369  | H(152) | 1.490  | 0.752   | -3.003  |
| C(113) | 8.277  | -3.029  | 3.405  | H(153) | -2.569 | 1.767   | -1.994  |
| C(114) | 7.485  | -3.916  | 2.652  | H(154) | -0.596 | 0.218   | -1.764  |
| C(115) | 0.365  | -9.379  | -3.483 | H(155) | 13.199 | 0.169   | 3.680   |
| C(116) | 2.393  | -8.292  | -3.821 | H(156) | 11.842 | 0.318   | 4.789   |
| C(117) | 3.045  | -7.002  | -4.176 | H(157) | 9.929  | 4.302   | 0.933   |
| C(118) | 3.101  | -9.457  | -3.520 | H(158) | 9.609  | 3.378   | -1.388  |
| C(119) | 2.394  | -10.612 | -3.190 | H(159) | 10.001 | 0.137   | -4.160  |
| N(120) | 1.041  | -8.267  | -3.807 | H(160) | 9.628  | -0.748  | 4.091   |



| atom   | x      | y      | z      | atom   | x      | y       | z      |
|--------|--------|--------|--------|--------|--------|---------|--------|
| H(161) | 9.916  | -4.207 | 1.568  | H(201) | 5.119  | 7.504   | 3.764  |
| H(162) | 10.164 | -4.681 | -0.772 | H(202) | 3.926  | 3.577   | 5.073  |
| H(163) | 13.430 | -3.601 | 0.578  | H(203) | -1.944 | 4.613   | 5.780  |
| H(164) | 12.174 | -4.833 | 0.671  | H(204) | 2.529  | 2.775   | 6.545  |
| H(165) | 13.182 | 3.281  | -0.345 | H(205) | -1.730 | 2.532   | 7.118  |
| H(166) | 11.812 | 4.378  | -0.521 | H(206) | 0.570  | 1.587   | 7.509  |
| H(167) | 10.036 | 1.781  | 4.415  | H(207) | 6.684  | 6.575   | 2.772  |
| H(168) | 13.571 | -0.556 | -3.291 | H(208) | 8.816  | 5.636   | 2.148  |
| H(169) | 12.393 | -0.771 | -4.589 | H(209) | 5.891  | 3.116   | 5.231  |
| H(170) | 10.445 | -2.221 | -4.284 | H(210) | 7.968  | 2.134   | 4.509  |
| H(171) | 15.532 | 1.466  | -2.715 | H(211) | -0.577 | -4.429  | 9.523  |
| H(172) | 14.209 | 1.538  | -3.891 | H(212) | 4.300  | -4.400  | 9.018  |
| H(173) | 15.057 | 3.820  | -2.027 | H(213) | 3.337  | -4.137  | 11.290 |
| H(174) | 13.669 | 3.870  | -3.114 | H(214) | 0.837  | -4.143  | 11.562 |
| H(175) | 15.177 | 0.720  | 1.773  | H(215) | 4.871  | -4.059  | 6.956  |
| H(176) | 14.397 | 1.674  | 3.046  | H(216) | 3.621  | -4.930  | 2.931  |
| H(177) | 15.392 | 2.787  | 0.377  | H(217) | -2.165 | -6.137  | 4.049  |
| H(178) | 14.543 | 3.718  | 1.616  | H(218) | 2.261  | -6.359  | 1.970  |
| H(179) | 14.919 | -3.318 | -1.197 | H(219) | -1.964 | -7.150  | 1.790  |
| H(180) | 14.869 | -2.254 | -2.614 | H(220) | 0.313  | -7.260  | 0.722  |
| H(181) | 15.832 | -1.432 | 0.175  | H(221) | 6.180  | -2.687  | 6.070  |
| H(182) | 15.838 | -0.393 | -1.245 | H(222) | 8.347  | -1.949  | 5.279  |
| H(183) | 15.425 | -2.686 | 2.237  | H(223) | 5.710  | -5.091  | 2.519  |
| H(184) | 14.043 | -3.705 | 2.667  | H(224) | 7.821  | -4.251  | 1.676  |
| H(185) | 13.798 | -2.380 | 4.817  | H(225) | -0.717 | -9.300  | -3.485 |
| H(186) | 15.202 | -3.428 | 4.694  | H(226) | 4.183  | -9.473  | -3.554 |
| H(187) | 15.483 | 5.037  | -4.190 | H(227) | 2.929  | -11.527 | -2.957 |
| H(188) | 15.200 | 3.555  | -5.086 | H(228) | 0.415  | -11.452 | -2.912 |
| H(189) | 15.310 | -0.404 | 4.187  | H(229) | 5.043  | -7.489  | -3.556 |
| H(190) | 15.650 | -1.156 | 5.734  | H(230) | 4.315  | -3.500  | -5.002 |
| H(191) | 17.477 | -2.981 | -0.942 | H(231) | -1.578 | -4.031  | -6.091 |
| H(192) | 18.095 | -1.360 | -0.679 | H(232) | 3.061  | -2.496  | -6.423 |
| H(193) | 6.519  | 2.283  | -6.288 | H(233) | -1.102 | -1.934  | -7.347 |
| H(194) | 8.773  | 1.799  | -5.451 | H(234) | 1.280  | -1.141  | -7.492 |
| H(195) | 5.165  | 2.914  | -2.245 | H(235) | 6.709  | -6.686  | -2.562 |
| H(196) | 7.417  | 2.418  | -1.415 | H(236) | 8.917  | -5.923  | -1.934 |
| H(197) | -0.416 | 9.912  | 3.549  | H(237) | 6.276  | -3.259  | -5.151 |
| H(198) | 4.468  | 9.573  | 3.818  | H(238) | 8.412  | -2.435  | -4.411 |
| H(199) | 3.457  | 11.769 | 3.262  | H(239) | 17.656 | 4.022   | -4.780 |
| H(200) | 0.953  | 11.956 | 3.117  | H(240) | 17.222 | 2.496   | -4.003 |

| atom   | x      | y      | z      | atom   | x      | y      | z      |
|--------|--------|--------|--------|--------|--------|--------|--------|
| H(241) | 17.456 | 3.950  | -3.022 | C(281) | -0.166 | -0.140 | 4.440  |
| H(242) | 17.771 | -0.683 | 4.531  | N(282) | -0.020 | -2.672 | 5.603  |
| H(243) | 17.255 | -1.651 | 3.147  | C(283) | 1.063  | -0.674 | 4.818  |
| H(244) | 17.568 | -2.434 | 4.704  | C(284) | -3.692 | -2.675 | 5.136  |
| H(245) | 18.773 | -2.125 | -2.926 | C(285) | -4.466 | -4.707 | 6.149  |
| H(246) | 17.623 | -0.790 | -3.108 | C(286) | -4.764 | -3.523 | 5.453  |
| H(247) | 17.100 | -2.458 | -3.383 | N(287) | -2.141 | -4.153 | 6.171  |
| H(248) | 16.887 | 4.179  | 1.867  | C(288) | -3.142 | -4.991 | 6.488  |
| H(249) | 16.394 | 3.222  | 3.252  | N(289) | -1.377 | -6.409 | 7.286  |
| H(250) | 17.449 | 1.167  | 2.224  | C(290) | -0.901 | -7.494 | 7.913  |
| H(251) | 18.621 | 2.484  | 2.338  | C(291) | -3.608 | -7.138 | 7.763  |
| H(252) | 17.865 | 2.106  | 0.782  | C(292) | -2.714 | -6.224 | 7.203  |
| C(253) | 1.503  | -4.899 | -1.744 | C(293) | -1.730 | -8.453 | 8.489  |
| C(254) | -0.757 | -4.516 | -2.039 | C(294) | -3.109 | -8.266 | 8.412  |
| C(255) | -1.979 | -4.866 | -2.811 | C(295) | -6.516 | -1.824 | 4.902  |
| C(256) | -0.760 | -3.572 | -1.008 | C(296) | -7.771 | -1.475 | 4.421  |
| C(257) | 0.428  | -3.291 | -0.339 | C(297) | -7.089 | -4.154 | 4.708  |
| N(258) | 0.369  | -5.165 | -2.405 | C(298) | -6.138 | -3.172 | 5.034  |
| C(259) | 1.586  | -3.970 | -0.709 | C(299) | -8.348 | -3.801 | 4.230  |
| C(260) | -3.243 | -4.351 | -2.530 | C(300) | -8.713 | -2.454 | 4.054  |
| C(261) | -4.111 | -5.623 | -4.370 | C(301) | 1.460  | 5.902  | 1.465  |
| C(262) | -4.346 | -4.733 | -3.309 | C(302) | -0.819 | 5.556  | 1.632  |
| N(263) | -1.788 | -5.720 | -3.826 | C(303) | -2.035 | 5.723  | 2.470  |
| C(264) | -2.821 | -6.102 | -4.597 | C(304) | -0.865 | 5.037  | 0.336  |
| N(265) | -1.154 | -7.313 | -5.830 | C(305) | 0.311  | 4.959  | -0.407 |
| C(266) | -0.742 | -8.136 | -6.805 | N(306) | 0.336  | 5.984  | 2.187  |
| C(267) | -3.416 | -7.615 | -6.553 | C(307) | 1.500  | 5.399  | 0.166  |
| C(268) | -2.471 | -7.043 | -5.698 | C(308) | -3.281 | 5.185  | 2.148  |
| C(269) | -1.623 | -8.737 | -7.699 | C(309) | -4.181 | 6.252  | 4.103  |
| C(270) | -2.984 | -8.472 | -7.564 | C(310) | -4.387 | 5.438  | 2.975  |
| C(271) | -6.100 | -3.954 | -1.693 | N(311) | -1.861 | 6.453  | 3.580  |
| C(272) | -7.383 | -3.500 | -1.409 | C(312) | -2.902 | 6.739  | 4.378  |
| C(273) | -6.641 | -4.010 | -4.041 | N(313) | -1.248 | 7.817  | 5.747  |
| C(274) | -5.703 | -4.224 | -3.015 | C(314) | -0.854 | 8.567  | 6.785  |
| C(275) | -7.921 | -3.551 | -3.753 | C(315) | -3.528 | 8.129  | 6.411  |
| C(276) | -8.326 | -3.291 | -2.431 | C(316) | -2.567 | 7.590  | 5.554  |
| C(277) | 1.082  | -1.941 | 5.397  | C(317) | -1.753 | 9.137  | 7.683  |
| C(278) | -1.213 | -2.152 | 5.245  | C(318) | -3.114 | 8.912  | 7.487  |
| C(279) | -2.396 | -3.009 | 5.522  | C(319) | -6.120 | 4.633  | 1.344  |
| C(280) | -1.321 | -0.886 | 4.664  | C(320) | -7.375 | 4.105  | 1.057  |

| atom   | x       | y      | z      | atom   | x       | y      | z      |
|--------|---------|--------|--------|--------|---------|--------|--------|
| C(321) | -6.615  | 4.526  | 3.699  | C(361) | -12.378 | -1.247 | 2.158  |
| C(322) | -5.716  | 4.862  | 2.671  | C(362) | -10.605 | 3.246  | -2.757 |
| C(323) | -7.869  | 3.999  | 3.409  | O(363) | -13.759 | -1.995 | -1.483 |
| C(324) | -8.284  | 3.784  | 2.081  | C(364) | -12.353 | 2.601  | 1.382  |
| C(325) | 0.349   | 2.073  | -8.554 | C(365) | -11.668 | 3.345  | 0.396  |
| C(326) | -1.799  | 2.356  | -7.732 | C(366) | -12.312 | 3.725  | -0.937 |
| C(327) | -2.684  | 3.192  | -6.876 | C(367) | -11.770 | 2.872  | -2.081 |
| C(328) | -2.264  | 1.273  | -8.481 | C(368) | -12.313 | -3.318 | 0.647  |
| C(329) | -1.369  | 0.581  | -9.296 | C(369) | -10.623 | -0.841 | 3.761  |
| N(330) | -0.505  | 2.744  | -7.774 | C(370) | -10.023 | 2.426  | -3.736 |
| C(331) | -0.037  | 0.987  | -9.339 | C(371) | -12.397 | -0.588 | -3.665 |
| C(332) | -4.012  | 2.890  | -6.580 | C(372) | -10.653 | 1.212  | -4.045 |
| C(333) | -4.159  | 4.972  | -5.386 | C(373) | -12.375 | 1.646  | -2.419 |
| C(334) | -4.772  | 3.775  | -5.795 | C(374) | -11.816 | 0.796  | -3.391 |
| N(335) | -2.112  | 4.310  | -6.407 | C(375) | -14.614 | -2.765 | -2.357 |
| C(336) | -2.824  | 5.208  | -5.710 | C(376) | -14.788 | -4.212 | -1.900 |
| N(337) | -0.737  | 6.380  | -5.552 | C(377) | -14.758 | -0.907 | 2.225  |
| C(338) | 0.023   | 7.437  | -5.239 | C(378) | -15.422 | -2.282 | 2.167  |
| C(339) | -2.665  | 7.549  | -4.742 | C(379) | -14.753 | 1.630  | -2.329 |
| C(340) | -2.066  | 6.423  | -5.309 | C(380) | -15.879 | 1.125  | -1.440 |
| C(341) | -0.501  | 8.595  | -4.669 | C(381) | -14.519 | 3.588  | 1.530  |
| C(342) | -1.870  | 8.648  | -4.418 | C(382) | -14.851 | 3.813  | 3.004  |
| C(343) | -12.295 | 1.013  | 3.393  | C(383) | -16.732 | -2.354 | 2.971  |
| C(344) | -11.783 | -0.401 | 3.119  | C(384) | -15.687 | -5.039 | -2.836 |
| O(345) | -13.501 | 1.240  | -1.735 | C(385) | -15.863 | 2.820  | 3.591  |
| O(346) | -13.515 | -0.843 | 1.494  | C(386) | -17.267 | 1.476  | -1.989 |
| C(347) | -12.405 | -2.192 | -1.655 | C(387) | -6.512  | 2.104  | -5.123 |
| O(348) | -13.716 | 2.406  | 1.289  | C(388) | -7.768  | 1.786  | -4.622 |
| C(349) | -10.007 | -2.061 | 3.442  | C(389) | -7.108  | 4.439  | -5.125 |
| C(350) | -10.604 | -2.856 | 2.453  | C(390) | -6.148  | 3.440  | -5.366 |
| C(351) | -11.775 | -2.468 | 1.794  | C(391) | -8.370  | 4.116  | -4.636 |
| C(352) | -11.687 | -2.920 | -0.686 | C(392) | -8.722  | 2.785  | -4.355 |
| C(353) | -10.354 | -3.247 | -0.950 | C(393) | -17.865 | -1.475 | 2.427  |
| C(354) | -9.708  | -2.845 | -2.127 | C(394) | -17.159 | -4.607 | -2.850 |
| C(355) | -10.412 | -2.004 | -3.002 | C(395) | -16.161 | 3.078  | 5.071  |
| C(356) | -11.741 | -1.641 | -2.772 | C(396) | -18.402 | 0.982  | -1.086 |
| C(357) | -9.650  | 3.282  | 1.785  | H(397) | 2.385   | -5.447 | -2.057 |
| C(358) | -10.311 | 2.399  | 2.652  | H(398) | -1.669  | -3.053 | -0.730 |
| C(359) | -11.647 | 2.035  | 2.463  | H(399) | 0.444   | -2.554 | 0.458  |
| C(360) | -10.337 | 3.697  | 0.635  | H(400) | 2.535   | -3.790 | -0.215 |

| atom   | x      | y      | z      | atom   | x       | y      | z      |
|--------|--------|--------|--------|--------|---------|--------|--------|
| H(401) | -3.379 | -3.644 | -1.722 | H(441) | -1.714  | -0.256 | -9.894 |
| H(402) | -4.935 | -5.950 | -4.989 | H(442) | 0.690   | 0.486  | -9.968 |
| H(403) | 0.326  | -8.316 | -6.860 | H(443) | -4.460  | 1.977  | -6.950 |
| H(404) | -4.472 | -7.407 | -6.436 | H(444) | -4.703  | 5.674  | -4.768 |
| H(405) | -1.247 | -9.397 | -8.472 | H(445) | 1.082   | 7.350  | -5.456 |
| H(406) | -3.706 | -8.925 | -8.235 | H(446) | -3.733  | 7.581  | -4.566 |
| H(407) | -5.410 | -4.126 | -0.873 | H(447) | 0.152   | 9.428  | -4.434 |
| H(408) | -7.650 | -3.296 | -0.377 | H(448) | -2.320  | 9.532  | -3.979 |
| H(409) | -6.365 | -4.187 | -5.076 | H(449) | -13.374 | 1.071  | 3.278  |
| H(410) | -8.627 | -3.418 | -4.568 | H(450) | -12.060 | 1.270  | 4.432  |
| H(411) | 2.022  | -2.384 | 5.706  | H(451) | -10.132 | -3.790 | 2.165  |
| H(412) | -2.286 | -0.474 | 4.397  | H(452) | -9.824  | -3.874 | -0.240 |
| H(413) | -0.232 | 0.842  | 3.987  | H(453) | -9.904  | -1.598 | -3.872 |
| H(414) | 1.990  | -0.130 | 4.673  | H(454) | -9.775  | 1.989  | 3.503  |
| H(415) | -3.872 | -1.779 | 4.558  | H(455) | -9.836  | 4.343  | -0.079 |
| H(416) | -5.261 | -5.390 | 6.419  | H(456) | -10.120 | 4.182  | -2.493 |
| H(417) | 0.179  | -7.590 | 7.955  | H(457) | -13.392 | 3.609  | -0.874 |
| H(418) | -4.677 | -6.974 | 7.708  | H(458) | -12.105 | 4.779  | -1.153 |
| H(419) | -1.300 | -9.315 | 8.986  | H(459) | -13.393 | -3.216 | 0.579  |
| H(420) | -3.791 | -8.985 | 8.853  | H(460) | -12.083 | -4.369 | 0.854  |
| H(421) | -5.825 | -1.033 | 5.177  | H(461) | -10.189 | -0.210 | 4.531  |
| H(422) | -8.006 | -0.423 | 4.293  | H(462) | -13.473 | -0.580 | -3.503 |
| H(423) | -6.834 | -5.207 | 4.787  | H(463) | -12.222 | -0.842 | -4.717 |
| H(424) | -9.054 | -4.588 | 3.982  | H(464) | -10.231 | 0.577  | -4.818 |
| H(425) | 2.368  | 6.257  | 1.939  | H(465) | -15.567 | -2.230 | -2.350 |
| H(426) | -1.803 | 4.718  | -0.102 | H(466) | -14.219 | -2.741 | -3.381 |
| H(427) | 0.290  | 4.573  | -1.420 | H(467) | -15.205 | -4.222 | -0.884 |
| H(428) | 2.440  | 5.364  | -0.373 | H(468) | -13.798 | -4.684 | -1.843 |
| H(429) | -3.392 | 4.545  | 1.283  | H(469) | -15.387 | -0.142 | 1.763  |
| H(430) | -5.013 | 6.495  | 4.751  | H(470) | -14.592 | -0.624 | 3.273  |
| H(431) | 0.216  | 8.715  | 6.892  | H(471) | -15.616 | -2.543 | 1.119  |
| H(432) | -4.584 | 7.953  | 6.244  | H(472) | -14.721 | -3.029 | 2.561  |
| H(433) | -1.390 | 9.739  | 8.508  | H(473) | -14.790 | 2.725  | -2.429 |
| H(434) | -3.849 | 9.341  | 8.160  | H(474) | -14.831 | 1.206  | -3.341 |
| H(435) | -5.459 | 4.891  | 0.522  | H(475) | -15.749 | 1.551  | -0.438 |
| H(436) | -7.648 | 3.935  | 0.020  | H(476) | -15.775 | 0.038  | -1.335 |
| H(437) | -6.328 | 4.662  | 4.737  | H(477) | -15.435 | 3.436  | 0.949  |
| H(438) | -8.546 | 3.774  | 4.227  | H(478) | -14.002 | 4.465  | 1.126  |
| H(439) | 1.376  | 2.423  | -8.556 | H(479) | -13.921 | 3.802  | 3.590  |
| H(440) | -3.307 | 0.981  | -8.452 | H(480) | -15.256 | 4.831  | 3.092  |

| atom    | x       | y      | z      |
|---------|---------|--------|--------|
| H(481)  | -17.067 | -3.399 | 2.984  |
| H(482)  | -16.530 | -2.088 | 4.019  |
| H(483)  | -15.628 | -6.090 | -2.525 |
| H(484)  | -15.281 | -5.001 | -3.857 |
| H(485)  | -15.492 | 1.796  | 3.465  |
| H(486)  | -16.795 | 2.880  | 3.012  |
| H(487)  | -17.384 | 1.043  | -2.993 |
| H(488)  | -17.347 | 2.565  | -2.113 |
| H(489)  | -5.788  | 1.308  | -5.264 |
| H(490)  | -7.994  | 0.750  | -4.388 |
| H(491)  | -6.878  | 5.479  | -5.339 |
| H(492)  | -9.094  | 4.910  | -4.476 |
| H(493)  | -18.789 | -1.634 | 2.995  |
| H(494)  | -18.074 | -1.709 | 1.376  |
| H(495)  | -17.624 | -0.407 | 2.488  |
| H(496)  | -17.756 | -5.277 | -3.479 |
| H(497)  | -17.287 | -3.591 | -3.241 |
| H(498)  | -17.585 | -4.630 | -1.840 |
| H(499)  | -16.895 | 2.364  | 5.460  |
| H(500)  | -16.564 | 4.088  | 5.223  |
| H(501)  | -15.252 | 2.989  | 5.679  |
| H(502)  | -19.383 | 1.242  | -1.500 |
| H(503)  | -18.332 | 1.428  | -0.086 |
| H(504)  | -18.367 | -0.108 | -0.966 |
| Zn(505) | 0.141   | -6.403 | -4.391 |
| Zn(506) | -0.143  | -4.865 | 6.441  |
| Zn(507) | -0.050  | 4.550  | -6.442 |
| Zn(508) | 0.084   | 6.900  | 4.324  |

**Table S2.** Cartesian coordinates of mercaptopurine@Zn<sub>4</sub>L<sub>2</sub> cages from B3LYP/6-31Gd optimization.

| atom  | x       | y      | z      | atom  | x       | y       | z      |
|-------|---------|--------|--------|-------|---------|---------|--------|
| C(1)  | -0.723  | -8.455 | -8.869 | C(41) | -10.947 | 3.051   | 1.040  |
| C(2)  | -2.390  | -7.464 | -7.544 | C(42) | -11.515 | 3.618   | -0.268 |
| C(3)  | -2.672  | -6.669 | -6.318 | C(43) | -10.921 | 3.014   | -1.545 |
| C(4)  | -3.384  | -7.944 | -8.404 | C(44) | -11.512 | -3.579  | 0.031  |
| C(5)  | -3.021  | -8.699 | -9.525 | C(45) | -9.968  | -1.774  | 3.675  |
| N(6)  | -1.069  | -7.727 | -7.784 | C(46) | -9.310  | 3.100   | -3.404 |
| C(7)  | -1.669  | -8.959 | -9.765 | C(47) | -11.404 | -0.128  | -3.755 |
| C(8)  | -3.937  | -6.180 | -5.955 | C(48) | -9.797  | 1.853   | -3.855 |
| C(9)  | -2.946  | -5.288 | -3.953 | C(49) | -11.459 | 1.830   | -2.102 |
| C(10) | -4.096  | -5.458 | -4.750 | C(50) | -10.861 | 1.201   | -3.220 |
| N(11) | -1.585  | -6.450 | -5.535 | C(51) | -13.799 | -2.393  | -2.940 |
| C(12) | -1.717  | -5.801 | -4.355 | C(52) | -14.133 | -3.864  | -2.720 |
| N(13) | 0.661   | -6.103 | -4.126 | C(53) | -13.974 | -1.543  | 1.164  |
| C(14) | 1.804   | -6.077 | -3.404 | C(54) | -14.388 | -2.372  | 2.378  |
| C(15) | -0.513  | -5.242 | -2.207 | C(55) | -13.894 | 1.782   | -2.119 |
| C(16) | -0.492  | -5.693 | -3.535 | C(56) | -15.033 | 1.112   | -1.372 |
| C(17) | 1.856   | -5.645 | -2.078 | C(57) | -13.946 | 2.985   | 1.997  |
| C(18) | 0.673   | -5.213 | -1.473 | C(58) | -14.432 | 2.819   | 3.433  |
| C(19) | -11.621 | 0.170  | 3.527  | C(59) | -15.060 | -4.433  | -3.821 |
| C(20) | -11.018 | -1.139 | 3.005  | C(60) | -15.399 | 1.640   | 3.667  |
| O(21) | -12.604 | 1.279  | -1.545 | C(61) | -16.425 | 1.614   | -1.820 |
| O(22) | -12.552 | -1.068 | 1.190  | C(62) | -6.307  | -4.288  | -5.162 |
| C(23) | -11.529 | -2.063 | -2.052 | C(63) | -7.445  | -3.647  | -4.669 |
| O(24) | -13.016 | 1.874  | 1.580  | C(64) | -5.644  | -4.813  | -2.900 |
| C(25) | -9.425  | -2.997 | 3.222  | C(65) | -5.370  | -4.871  | -4.285 |
| C(26) | -9.962  | -3.559 | 2.045  | C(66) | -7.708  | -3.567  | -3.282 |
| C(27) | -11.006 | -2.954 | 1.335  | C(67) | -6.781  | -4.183  | -2.412 |
| C(28) | -10.862 | -2.999 | -1.225 | C(68) | 0.002   | -9.009  | 4.398  |
| C(29) | -9.584  | -3.426 | -1.612 | C(69) | -2.122  | -8.094  | 4.761  |
| C(30) | -8.939  | -2.921 | -2.762 | C(70) | -2.878  | -6.980  | 5.383  |
| C(31) | -9.547  | -1.832 | -3.424 | C(71) | -2.730  | -9.187  | 4.135  |
| C(32) | -10.818 | -1.366 | -3.065 | C(72) | -1.930  | -10.220 | 3.635  |
| C(33) | -9.165  | 3.027  | 2.729  | N(73) | -0.765  | -8.013  | 4.890  |
| C(34) | -9.810  | 1.937  | 3.350  | C(74) | -0.540  | -10.131 | 3.766  |
| C(35) | -11.025 | 1.419  | 2.880  | C(75) | -4.181  | -6.601  | 5.052  |
| C(36) | -9.709  | 3.501  | 1.517  | C(76) | -4.030  | -4.855  | 6.715  |
| C(37) | -11.549 | -1.749 | 1.842  | C(77) | -4.769  | -5.472  | 5.673  |
| C(38) | -9.864  | 3.639  | -2.221 | N(78) | -2.161  | -6.287  | 6.295  |
| O(39) | -12.889 | -1.858 | -1.869 | C(79) | -2.729  | -5.277  | 6.991  |
| C(40) | -11.667 | 2.103  | 1.818  | N(80) | -0.494  | -4.905  | 7.788  |

| atom   | x      | y      | z      | atom   | x       | y      | z       |
|--------|--------|--------|--------|--------|---------|--------|---------|
| C(81)  | 0.404  | -4.418 | 8.672  | C(121) | -1.577  | 11.442 | -4.859  |
| C(82)  | -2.270 | -3.941 | 9.101  | C(122) | -4.584  | 7.231  | -5.660  |
| C(83)  | -1.822 | -4.667 | 7.993  | C(123) | -4.030  | 5.228  | -6.880  |
| C(84)  | 0.025  | -3.687 | 9.800  | C(124) | -4.945  | 5.916  | -6.046  |
| C(85)  | -1.336 | -3.449 | 10.019 | N(125) | -2.401  | 6.956  | -6.607  |
| C(86)  | -7.016 | -5.658 | 4.519  | C(126) | -2.768  | 5.764  | -7.126  |
| C(87)  | -8.126 | -5.059 | 3.926  | C(127) | 0.587   | 4.997  | -8.341  |
| C(88)  | -6.233 | -3.490 | 5.234  | C(128) | -1.968  | 4.175  | -8.931  |
| C(89)  | -6.029 | -4.886 | 5.171  | C(129) | -1.706  | 5.104  | -7.917  |
| C(90)  | -8.305 | -3.655 | 3.937  | C(130) | 0.400   | 4.072  | -9.371  |
| C(91)  | -7.337 | -2.895 | 4.632  | C(131) | -0.901  | 3.659  | -9.673  |
| C(92)  | -0.510 | 4.912  | 9.841  | C(132) | -7.198  | 5.926  | -4.870  |
| C(93)  | -2.408 | 5.113  | 8.481  | C(133) | -8.228  | 5.246  | -4.219  |
| C(94)  | -2.902 | 5.438  | 7.120  | C(134) | -6.212  | 3.820  | -5.497  |
| C(95)  | -3.246 | 4.821  | 9.561  | C(135) | -6.143  | 5.232  | -5.503  |
| C(96)  | -2.681 | 4.572  | 10.818 | C(136) | -8.264  | 3.832  | -4.166  |
| C(97)  | -1.290 | 4.614  | 10.961 | C(137) | -7.243  | 3.141  | -4.856  |
| C(98)  | -4.155 | 5.085  | 6.609  | C(138) | -16.466 | -3.808 | -3.854  |
| C(99)  | -3.550 | 6.161  | 4.536  | C(139) | -16.779 | 1.825  | 3.013   |
| C(100) | -4.487 | 5.395  | 5.268  | C(140) | -16.805 | 1.242  | -3.264  |
| N(101) | -1.992 | 6.070  | 6.346  | C(141) | -15.897 | -2.717 | 2.366   |
| C(102) | -2.312 | 6.473  | 5.098  | C(142) | -16.328 | -3.662 | 1.232   |
| N(103) | 0.012  | 7.046  | 4.937  | N(143) | -0.439  | 5.514  | -7.632  |
| C(104) | 1.052  | 7.717  | 4.400  | N(144) | -1.051  | 5.161  | 8.629   |
| C(105) | -1.456 | 8.085  | 3.334  | H(145) | 0.336   | -8.636 | -9.012  |
| C(106) | -1.232 | 7.219  | 4.411  | H(146) | -4.431  | -7.753 | -8.204  |
| C(107) | 0.901  | 8.600  | 3.328  | H(147) | -3.783  | -9.082 | -10.194 |
| C(108) | -0.376 | 8.787  | 2.790  | H(148) | -1.352  | -9.542 | -10.621 |
| C(109) | -6.831 | 4.451  | 5.378  | H(149) | -4.799  | -6.367 | -6.582  |
| C(110) | -7.939 | 3.868  | 4.765  | H(150) | -3.024  | -4.711 | -3.044  |
| C(111) | -5.770 | 4.694  | 3.222  | H(151) | 2.698   | -6.413 | -3.910  |
| C(112) | -5.711 | 4.866  | 4.624  | H(152) | -1.440  | -4.933 | -1.744  |
| C(113) | -7.990 | 3.675  | 3.365  | H(153) | 2.791   | -5.630 | -1.531  |
| C(114) | -6.883 | 4.119  | 2.612  | H(154) | 0.676   | -4.867 | -0.446  |
| C(115) | -0.829 | 10.305 | -5.178 | H(155) | -12.695 | 0.164  | 3.349   |
| C(116) | -2.771 | 9.041  | -5.537 | H(156) | -11.459 | 0.217  | 4.610   |
| C(117) | -3.307 | 7.721  | -5.957 | H(157) | -9.545  | -4.486 | 1.661   |
| C(118) | -3.576 | 10.140 | -5.227 | H(158) | -9.129  | -4.239 | -1.055  |
| C(119) | -2.972 | 11.357 | -4.887 | H(159) | -9.023  | -1.345 | -4.242  |
| N(120) | -1.406 | 9.130  | -5.514 | H(160) | -9.393  | 1.511  | 4.261   |

| atom   | x       | y       | z      | atom   | x       | y      | z       |
|--------|---------|---------|--------|--------|---------|--------|---------|
| H(161) | -9.208  | 4.307   | 0.988  | H(201) | -4.711  | -7.112 | 4.258   |
| H(162) | -9.487  | 4.583   | -1.835 | H(202) | -4.465  | -4.031 | 7.265   |
| H(163) | -12.593 | 3.460   | -0.279 | H(203) | 1.445   | -4.638 | 8.470   |
| H(164) | -11.343 | 4.701   | -0.286 | H(204) | -3.330  | -3.796 | 9.271   |
| H(165) | -12.592 | -3.462  | -0.049 | H(205) | 0.775   | -3.332 | 10.496  |
| H(166) | -11.308 | -4.655  | 0.068  | H(206) | -1.666  | -2.909 | 10.898  |
| H(167) | -9.610  | -1.345  | 4.607  | H(207) | -6.940  | -6.741 | 4.506   |
| H(168) | -12.487 | -0.136  | -3.642 | H(208) | -8.882  | -5.689 | 3.471   |
| H(169) | -11.187 | -0.182  | -4.828 | H(209) | -5.487  | -2.849 | 5.693   |
| H(170) | -9.396  | 1.423   | -4.768 | H(210) | -7.430  | -1.815 | 4.661   |
| H(171) | -14.679 | -1.755  | -2.866 | H(211) | 0.570   | 4.966  | 9.907   |
| H(172) | -13.324 | -2.240  | -3.916 | H(212) | -4.322  | 4.825  | 9.441   |
| H(173) | -14.616 | -3.983  | -1.741 | H(213) | -3.316  | 4.365  | 11.671  |
| H(174) | -13.201 | -4.445  | -2.697 | H(214) | -0.820  | 4.434  | 11.920  |
| H(175) | -14.115 | -2.074  | 0.224  | H(215) | -4.840  | 4.509  | 7.217   |
| H(176) | -14.528 | -0.604  | 1.121  | H(216) | -3.779  | 6.476  | 3.528   |
| H(177) | -13.809 | -3.305  | 2.421  | H(217) | 2.020   | 7.547  | 4.853   |
| H(178) | -14.159 | -1.814  | 3.296  | H(218) | -2.457  | 8.241  | 2.952   |
| H(179) | -13.924 | 2.873   | -2.002 | H(219) | 1.758   | 9.137  | 2.940   |
| H(180) | -13.905 | 1.554   | -3.191 | H(220) | -0.534  | 9.484  | 1.975   |
| H(181) | -14.888 | 1.298   | -0.303 | H(221) | -6.864  | 4.623  | 6.449   |
| H(182) | -14.957 | 0.028   | -1.512 | H(222) | -8.798  | 3.598  | 5.370   |
| H(183) | -14.764 | 2.924   | 1.279  | H(223) | -4.928  | 4.957  | 2.592   |
| H(184) | -13.423 | 3.939   | 1.867  | H(224) | -6.873  | 3.973  | 1.538   |
| H(185) | -13.560 | 2.735   | 4.096  | H(225) | 0.253   | 10.327 | -5.179  |
| H(186) | -14.938 | 3.755   | 3.713  | H(226) | -4.655  | 10.067 | -5.287  |
| H(187) | -15.153 | -5.513  | -3.658 | H(227) | -3.582  | 12.226 | -4.665  |
| H(188) | -14.577 | -4.314  | -4.802 | H(228) | -1.077  | 12.369 | -4.609  |
| H(189) | -14.937 | 0.712   | 3.303  | H(229) | -5.259  | 7.826  | -5.060  |
| H(190) | -15.533 | 1.515   | 4.749  | H(230) | -4.288  | 4.261  | -7.289  |
| H(191) | -16.481 | 2.705   | -1.694 | H(231) | 1.577   | 5.350  | -8.083  |
| H(192) | -17.173 | 1.193   | -1.136 | H(232) | -2.987  | 3.896  | -9.171  |
| H(193) | -6.137  | -4.309  | -6.234 | H(233) | 1.250   | 3.705  | -9.934  |
| H(194) | -8.156  | -3.224  | -5.371 | H(234) | -1.087  | 2.966  | -10.486 |
| H(195) | -4.971  | -5.296  | -2.197 | H(235) | -7.241  | 7.010  | -4.903  |
| H(196) | -6.946  | -4.144  | -1.342 | H(236) | -9.035  | 5.817  | -3.774  |
| H(197) | 1.072   | -8.902  | 4.530  | H(237) | -5.424  | 3.230  | -5.952  |
| H(198) | -3.810  | -9.255  | 4.075  | H(238) | -7.231  | 2.056  | -4.850  |
| H(199) | -2.386  | -11.087 | 3.172  | H(239) | -17.094 | -4.309 | -4.597  |
| H(200) | 0.108   | -10.919 | 3.404  | H(240) | -16.443 | -2.743 | -4.117  |



| atom   | x       | y      | z      | atom   | x      | y      | z     |
|--------|---------|--------|--------|--------|--------|--------|-------|
| H(241) | -16.964 | -3.906 | -2.882 | C(281) | 0.080  | 1.124  | 4.635 |
| H(242) | -17.435 | 0.979  | 3.241  | N(282) | -0.096 | 3.654  | 5.802 |
| H(243) | -16.715 | 1.904  | 1.921  | C(283) | -1.171 | 1.697  | 4.883 |
| H(244) | -17.272 | 2.731  | 3.384  | C(284) | 3.603  | 3.561  | 5.618 |
| H(245) | -17.827 | 1.564  | -3.490 | C(285) | 4.373  | 5.574  | 6.700 |
| H(246) | -16.762 | 0.156  | -3.417 | C(286) | 4.679  | 4.400  | 5.977 |
| H(247) | -16.147 | 1.715  | -4.003 | N(287) | 2.029  | 5.056  | 6.620 |
| H(248) | -16.144 | -3.180 | 3.329  | C(288) | 3.041  | 5.869  | 7.019 |
| H(249) | -16.482 | -1.787 | 2.317  | N(289) | 1.255  | 7.249  | 7.876 |
| H(250) | -16.205 | -3.205 | 0.242  | C(290) | 0.771  | 8.305  | 8.568 |
| H(251) | -17.383 | -3.933 | 1.335  | C(291) | 3.493  | 7.940  | 8.428 |
| H(252) | -15.746 | -4.593 | 1.252  | C(292) | 2.607  | 7.060  | 7.796 |
| C(253) | -1.950  | 6.261  | -3.317 | C(293) | 1.603  | 9.220  | 9.216 |
| C(254) | 0.301   | 5.675  | -3.482 | C(294) | 2.987  | 9.031  | 9.145 |
| C(255) | 1.565   | 5.842  | -4.234 | C(295) | 6.411  | 2.670  | 5.501 |
| C(256) | 0.222   | 4.962  | -2.277 | C(296) | 7.595  | 2.265  | 4.897 |
| C(257) | -0.989  | 4.906  | -1.586 | C(297) | 6.942  | 4.973  | 5.001 |
| N(258) | -0.786  | 6.303  | -4.004 | C(298) | 6.037  | 4.030  | 5.530 |
| C(259) | -2.096  | 5.583  | -2.107 | C(299) | 8.120  | 4.560  | 4.375 |
| C(260) | 2.761   | 5.241  | -3.857 | C(300) | 8.455  | 3.191  | 4.265 |
| C(261) | 3.866   | 6.387  | -5.661 | C(301) | -1.489 | -4.078 | 3.993 |
| C(262) | 3.954   | 5.496  | -4.565 | C(302) | 0.809  | -4.366 | 3.704 |
| N(263) | 1.505   | 6.658  | -5.310 | C(303) | 2.049  | -4.970 | 4.238 |
| C(264) | 2.631   | 6.956  | -6.006 | C(304) | 0.805  | -3.505 | 2.596 |
| N(265) | 1.123   | 8.285  | -7.348 | C(305) | -0.398 | -2.909 | 2.209 |
| C(266) | 0.843   | 9.168  | -8.333 | N(306) | -0.333 | -4.662 | 4.381 |
| C(267) | 3.463   | 8.465  | -7.881 | C(307) | -1.568 | -3.183 | 2.924 |
| C(268) | 2.423   | 7.924  | -7.117 | C(308) | 3.314  | -4.650 | 3.752 |
| C(269) | 1.837   | 9.740  | -9.131 | C(309) | 4.280  | -6.049 | 5.461 |
| C(270) | 3.169   | 9.382  | -8.898 | C(310) | 4.468  | -5.175 | 4.369 |
| C(271) | 5.402   | 4.550  | -2.757 | N(311) | 1.895  | -5.818 | 5.283 |
| C(272) | 6.554   | 3.912  | -2.305 | C(312) | 2.981  | -6.367 | 5.885 |
| C(273) | 6.226   | 4.466  | -5.025 | N(313) | 1.331  | -7.443 | 7.283 |
| C(274) | 5.207   | 4.846  | -4.126 | C(314) | 0.948  | -8.284 | 8.270 |
| C(275) | 7.377   | 3.818  | -4.574 | C(315) | 3.627  | -8.026 | 7.706 |
| C(276) | 7.577   | 3.530  | -3.203 | C(316) | 2.661  | -7.306 | 6.994 |
| C(277) | -1.209  | 2.964  | 5.468  | C(317) | 1.864  | -9.029 | 9.016 |
| C(278) | 1.122   | 3.097  | 5.555  | C(318) | 3.226  | -8.895 | 8.727 |
| C(279) | 2.296   | 3.912  | 5.944  | C(319) | 5.984  | -4.568 | 2.476 |
| C(280) | 1.241   | 1.825  | 4.972  | C(320) | 7.175  | -4.044 | 1.979 |

| atom   | x      | y       | z      | atom   | x      | y      | z      |
|--------|--------|---------|--------|--------|--------|--------|--------|
| C(321) | 6.855  | -4.407  | 4.729  | C(361) | 11.620 | 1.680  | 1.783  |
| C(322) | 5.792  | -4.745  | 3.864  | C(362) | 10.140 | -3.442 | -2.503 |
| C(323) | 8.040  | -3.864  | 4.227  | O(363) | 12.861 | 2.132  | -1.860 |
| C(324) | 8.228  | -3.654  | 2.838  | C(364) | 12.024 | -2.147 | 1.528  |
| C(325) | -0.682 | -4.293  | -8.222 | C(365) | 11.317 | -3.045 | 0.687  |
| C(326) | 1.618  | -4.414  | -7.836 | C(366) | 11.894 | -3.520 | -0.652 |
| C(327) | 2.700  | -5.150  | -7.145 | C(367) | 11.243 | -2.859 | -1.870 |
| C(328) | 1.852  | -3.349  | -8.714 | C(368) | 11.347 | 3.608  | 0.132  |
| C(329) | 0.768  | -2.754  | -9.366 | C(369) | 10.285 | 1.526  | 3.789  |
| N(330) | 0.361  | -4.885  | -7.603 | C(370) | 9.501  | -2.829 | -3.603 |
| C(331) | -0.523 | -3.228  | -9.112 | C(371) | 11.538 | 0.437  | -3.882 |
| C(332) | 3.961  | -4.628  | -6.865 | C(372) | 9.961  | -1.560 | -4.014 |
| C(333) | 4.558  | -6.741  | -5.878 | C(373) | 11.745 | -1.640 | -2.390 |
| C(334) | 4.907  | -5.392  | -6.138 | C(374) | 11.067 | -0.945 | -3.418 |
| N(335) | 2.358  | -6.399  | -6.759 | C(375) | 13.742 | 2.774  | -2.889 |
| C(336) | 3.282  | -7.215  | -6.205 | C(376) | 14.080 | 4.212  | -2.508 |
| N(337) | 1.414  | -8.711  | -5.942 | C(377) | 14.012 | 1.267  | 1.063  |
| C(338) | 0.864  | -9.928  | -5.739 | C(378) | 14.465 | 2.384  | 2.000  |
| C(339) | 3.605  | -9.691  | -5.726 | C(379) | 14.178 | -1.610 | -2.538 |
| C(340) | 2.776  | -8.585  | -5.933 | C(380) | 15.366 | -0.954 | -1.858 |
| C(341) | 1.637  | -11.073 | -5.526 | C(381) | 14.331 | -2.992 | 1.601  |
| C(342) | 3.029  | -10.951 | -5.523 | C(382) | 14.774 | -3.028 | 3.060  |
| C(343) | 11.976 | -0.323  | 3.343  | C(383) | 16.004 | 2.421  | 2.164  |
| C(344) | 11.288 | 0.992   | 2.972  | C(384) | 15.011 | 4.900  | -3.534 |
| O(345) | 12.925 | -1.116  | -1.881 | C(385) | 15.705 | -1.879 | 3.487  |
| O(346) | 12.525 | 1.155   | 0.886  | C(386) | 16.709 | -1.444 | -2.438 |
| C(347) | 11.492 | 2.242   | -2.043 | C(387) | 6.270  | -3.359 | -5.553 |
| O(348) | 13.370 | -1.874  | 1.305  | C(388) | 7.354  | -2.742 | -4.930 |
| C(349) | 9.598  | 2.710   | 3.453  | C(389) | 7.181  | -5.519 | -5.008 |
| C(350) | 9.960  | 3.374   | 2.262  | C(390) | 6.135  | -4.766 | -5.594 |
| C(351) | 10.958 | 2.876   | 1.418  | C(391) | 8.264  | -4.904 | -4.382 |
| C(352) | 10.738 | 3.040   | -1.149 | C(392) | 8.379  | -3.492 | -4.303 |
| C(353) | 9.423  | 3.372   | -1.508 | C(393) | 16.774 | 2.801  | 0.888  |
| C(354) | 8.843  | 2.931   | -2.718 | C(394) | 16.424 | 4.298  | -3.615 |
| C(355) | 9.555  | 1.976   | -3.472 | C(395) | 16.160 | -2.000 | 4.950  |
| C(356) | 10.852 | 1.581   | -3.126 | C(396) | 17.919 | -0.777 | -1.764 |
| C(357) | 9.478  | -3.054  | 2.313  | H(397) | -2.785 | 6.785  | -3.756 |
| C(358) | 10.125 | -2.018  | 3.013  | H(398) | 1.093  | 4.462  | -1.873 |
| C(359) | 11.371 | -1.523  | 2.617  | H(399) | -1.089 | 4.334  | -0.671 |
| C(360) | 10.060 | -3.497  | 1.108  | H(400) | -3.048 | 5.562  | -1.589 |

| atom   | x      | y      | z      | atom   | x      | y       | z       |
|--------|--------|--------|--------|--------|--------|---------|---------|
| H(401) | 2.784  | 4.550  | -3.027 | H(441) | 0.932  | -1.950  | -10.074 |
| H(402) | 4.762  | 6.646  | -6.209 | H(442) | -1.386 | -2.800  | -9.607  |
| H(403) | -0.201 | 9.418  | -8.475 | H(443) | 4.194  | -3.619  | -7.173  |
| H(404) | 4.493  | 8.194  | -7.689 | H(444) | 5.252  | -7.394  | -5.365  |
| H(405) | 1.573  | 10.446 | -9.909 | H(445) | -0.218 | -9.978  | -5.760  |
| H(406) | 3.967  | 9.811  | -9.493 | H(446) | 4.683  | -9.587  | -5.760  |
| H(407) | 4.662  | 4.861  | -2.026 | H(447) | 1.158  | -12.033 | -5.380  |
| H(408) | 6.656  | 3.688  | -1.248 | H(448) | 3.659  | -11.822 | -5.381  |
| H(409) | 6.116  | 4.663  | -6.087 | H(449) | 13.040 | -0.272  | 3.117   |
| H(410) | 8.154  | 3.566  | -5.287 | H(450) | 11.882 | -0.468  | 4.425   |
| H(411) | -2.155 | 3.444  | 5.680  | H(451) | 9.440  | 4.284   | 1.979   |
| H(412) | 2.209  | 1.377  | 4.776  | H(452) | 8.890  | 4.088   | -0.890  |
| H(413) | 0.156  | 0.140  | 4.185  | H(453) | 9.088  | 1.533   | -4.348  |
| H(414) | -2.092 | 1.181  | 4.628  | H(454) | 9.652  | -1.585  | 3.890   |
| H(415) | 3.797  | 2.681  | 5.023  | H(455) | 9.558  | -4.259  | 0.519   |
| H(416) | 5.174  | 6.230  | 7.013  | H(456) | 9.774  | -4.396  | -2.132  |
| H(417) | -0.307 | 8.408  | 8.601  | H(457) | 12.962 | -3.314  | -0.670  |
| H(418) | 4.562  | 7.780  | 8.383  | H(458) | 11.766 | -4.606  | -0.734  |
| H(419) | 1.178  | 10.053 | 9.763  | H(459) | 12.432 | 3.591   | 0.027   |
| H(420) | 3.663  | 9.716  | 9.643  | H(460) | 11.040 | 4.656   | 0.231   |
| H(421) | 5.760  | 1.923  | 5.944  | H(461) | 10.057 | 1.025   | 4.726   |
| H(422) | 7.838  | 1.209  | 4.865  | H(462) | 12.616 | 0.505   | -3.748  |
| H(423) | 6.702  | 6.032  | 5.026  | H(463) | 11.329 | 0.536   | -4.954  |
| H(424) | 8.787  | 5.307  | 3.959  | H(464) | 9.495  | -1.070  | -4.863  |
| H(425) | -2.371 | -4.329 | 4.563  | H(465) | 14.627 | 2.138   | -2.912  |
| H(426) | 1.710  | -3.285 | 2.039  | H(466) | 13.244 | 2.733   | -3.865  |
| H(427) | -0.420 | -2.231 | 1.363  | H(467) | 14.559 | 4.215   | -1.520  |
| H(428) | -2.512 | -2.710 | 2.661  | H(468) | 13.148 | 4.786   | -2.420  |
| H(429) | 3.427  | -3.959 | 2.929  | H(469) | 14.350 | 1.424   | 0.041   |
| H(430) | 5.142  | -6.484 | 5.950  | H(470) | 14.354 | 0.289   | 1.406   |
| H(431) | -0.117 | -8.355 | 8.458  | H(471) | 14.122 | 3.358   | 1.625   |
| H(432) | 4.680  | -7.925 | 7.474  | H(472) | 14.010 | 2.249   | 2.991   |
| H(433) | 1.519  | -9.693 | 9.798  | H(473) | 14.213 | -2.703  | -2.445  |
| H(434) | 3.965  | -9.459 | 9.285  | H(474) | 14.129 | -1.359  | -3.606  |
| H(435) | 5.203  | -4.839 | 1.774  | H(475) | 15.316 | -1.163  | -0.783  |
| H(436) | 7.290  | -3.911 | 0.909  | H(476) | 15.285 | 0.134   | -1.969  |
| H(437) | 6.749  | -4.541 | 5.801  | H(477) | 15.172 | -2.792  | 0.933   |
| H(438) | 8.844  | -3.620 | 4.912  | H(478) | 13.858 | -3.937  | 1.312   |
| H(439) | -1.663 | -4.696 | -8.006 | H(479) | 13.889 | -3.066  | 3.712   |
| H(440) | 2.862  | -3.019 | -8.922 | H(480) | 15.301 | -3.983  | 3.209   |

|         |        |        |        |        |        |        |        |
|---------|--------|--------|--------|--------|--------|--------|--------|
| atom    | x      | y      | z      | atom   | x      | y      | z      |
| H(481)  | 16.242 | 3.145  | 2.953  | H(521) | -6.664 | 4.762  | -1.238 |
| H(482)  | 16.354 | 1.446  | 2.531  | N(522) | -4.731 | 4.135  | -0.560 |
| H(483)  | 15.089 | 5.960  | -3.260 | S(523) | -8.302 | -0.240 | 0.036  |
| H(484)  | 14.540 | 4.879  | -4.528 | C(524) | -6.282 | -0.344 | 1.967  |
| H(485)  | 15.198 | -0.916 | 3.337  | C(525) | -6.743 | -0.828 | 0.739  |
| H(486)  | 16.586 | -1.871 | 2.829  | N(526) | -5.954 | -1.704 | 0.082  |
| H(487)  | 16.739 | -1.247 | -3.519 | C(527) | -4.772 | -2.095 | 0.641  |
| H(488)  | 16.782 | -2.535 | -2.323 | N(528) | -4.257 | -1.669 | 1.801  |
| H(489)  | 5.504  | -2.719 | -5.974 | C(529) | -5.023 | -0.768 | 2.461  |
| H(490)  | 7.399  | -1.658 | -4.913 | N(530) | -6.765 | 0.548  | 2.903  |
| H(491)  | 7.176  | -6.602 | -5.065 | H(531) | -8.416 | -1.239 | -0.911 |
| H(492)  | 9.060  | -5.523 | -3.984 | H(532) | -4.194 | -2.805 | 0.066  |
| H(493)  | 17.845 | 2.892  | 1.096  | H(533) | -7.658 | 1.031  | 2.873  |
| H(494)  | 16.432 | 3.767  | 0.495  | C(534) | -5.807 | 0.643  | 3.890  |
| H(495)  | 16.659 | 2.051  | 0.095  | H(535) | -5.932 | 1.295  | 4.739  |
| H(496)  | 17.055 | 4.882  | -4.292 | N(536) | -4.742 | -0.131 | 3.666  |
| H(497)  | 16.419 | 3.267  | -3.989 | S(537) | 5.291  | 0.288  | -2.903 |
| H(498)  | 16.909 | 4.298  | -2.631 | C(538) | 4.762  | -2.081 | -1.491 |
| H(499)  | 16.827 | -1.177 | 5.226  | C(539) | 4.494  | -0.714 | -1.612 |
| H(500)  | 16.705 | -2.937 | 5.118  | N(540) | 3.618  | -0.160 | -0.759 |
| H(501)  | 15.305 | -1.983 | 5.637  | C(541) | 3.015  | -0.942 | 0.179  |
| H(502)  | 18.858 | -1.147 | -2.187 | N(542) | 3.183  | -2.267 | 0.351  |
| H(503)  | 17.936 | -0.982 | -0.686 | C(543) | 4.074  | -2.829 | -0.500 |
| H(504)  | 17.899 | 0.311  | -1.899 | N(544) | 5.601  | -2.984 | -2.118 |
| Zn(505) | -0.356 | 7.291  | -6.117 | H(545) | 5.065  | 1.502  | -2.297 |
| Zn(506) | 0.063  | 5.765  | 6.827  | H(546) | 2.338  | -0.434 | 0.852  |
| Zn(507) | 0.321  | -6.857 | -6.372 | H(547) | 6.255  | -2.801 | -2.872 |
| Zn(508) | -0.039 | -6.260 | 6.067  | C(548) | 5.399  | -4.204 | -1.511 |
| S(509)  | -5.470 | -0.407 | -2.820 | H(549) | 5.942  | -5.085 | -1.812 |
| C(510)  | -4.947 | 2.019  | -1.458 | N(550) | 4.483  | -4.160 | -0.541 |
| C(511)  | -4.489 | 0.737  | -1.764 | S(551) | 7.964  | 0.311  | 0.372  |
| N(512)  | -3.287 | 0.366  | -1.291 | C(552) | 5.858  | 0.385  | 2.219  |
| C(513)  | -2.553 | 1.258  | -0.567 | C(553) | 6.503  | 1.039  | 1.162  |
| N(514)  | -2.889 | 2.527  | -0.271 | N(554) | 5.998  | 2.215  | 0.748  |
| C(515)  | -4.106 | 2.899  | -0.721 | C(555) | 4.893  | 2.722  | 1.366  |
| N(516)  | -6.096 | 2.742  | -1.712 | N(556) | 4.206  | 2.164  | 2.374  |
| H(517)  | -5.756 | -1.289 | -1.752 | C(557) | 4.710  | 0.982  | 2.792  |
| H(518)  | -1.596 | 0.904  | -0.207 | N(558) | 6.061  | -0.782 | 2.938  |
| H(519)  | -6.928 | 2.412  | -2.185 | H(559) | 8.319  | 1.434  | -0.348 |
| C(520)  | -5.914 | 3.992  | -1.163 | H(560) | 4.545  | 3.678  | 0.998  |

| atom   | x     | y      | z     |
|--------|-------|--------|-------|
| H(561) | 6.794 | -1.468 | 2.803 |
| C(562) | 5.064 | -0.844 | 3.890 |
| H(563) | 5.000 | -1.660 | 4.590 |
| N(564) | 4.228 | 0.193  | 3.838 |
| H(565) | 4.146 | -4.954 | 0.059 |
| H(566) | 3.393 | 0.376  | 4.448 |
| H(561) | 6.794 | -1.468 | 2.803 |
| C(562) | 5.064 | -0.844 | 3.890 |
| H(563) | 5.000 | -1.660 | 4.590 |
| N(564) | 4.228 | 0.193  | 3.838 |
| H(565) | 4.146 | -4.954 | 0.059 |
| H(566) | 3.393 | 0.376  | 4.448 |

**Table S3** Energies of  $\text{Zn}_4\text{L}_2$  cage, mercaptopurine, and mercaptopurine@ $\text{Zn}_4\text{L}_2$  cage obtained from computational study (B3LYP/6-31Gd).

| System                      | E (cage) (au)  | E (mercaptopurine) (au) | E (mercaptopurine@cage) (au) | $E_s^\#$ (kcal/mol) |
|-----------------------------|----------------|-------------------------|------------------------------|---------------------|
| mercaptopurine@cage complex | -18917.3776588 | -810.1467574            | -22157.8924983               | -45.3               |

$^\#E_s$  denotes the complex stabilization energy.

### Reference:

1. Gaussian 09, Revision E.01, Frisch, M. J.; Trucks, G. W.; Schlegel, H. B.; Scuseria, G. E.; Robb, M. A.; Cheeseman, J. R.; Scalmani, G.; Barone, V.; Mennucci, B.; Petersson, G. A.; Nakatsuji, H.; Caricato, M.; Li, X.; Hratchian, H. P.; Izmaylov, A. F.; Bloino, J.; Zheng, G.; Sonnenberg, J. L.; Hada, M.; Ehara, M.; Toyota, K.; Fukuda, R.; Hasegawa, J.; Ishida, M.; Nakajima, T.; Honda, Y.; Kitao, O.; Nakai, H.; Vreven, T.; Montgomery, J. A., Jr.; Peralta, J. E.; Ogliaro, F.; Bearpark, M.; Heyd, J. J.; Brothers, E.; Kudin, K. N.; Staroverov, V. N.; Kobayashi, R.; Normand, J.; Raghavachari, K.; Rendell, A.; Burant, J. C.; Iyengar, S. S.; Tomasi, J.; Cossi, M.;

Rega, N.; Millam, J. M.; Klene, M.; Knox, J. E.; Cross, J. B.; Bakken, V.; Adamo, C.; Jaramillo, J.; Gomperts, R.; Stratmann, R. E.; Yazyev, O.; Austin, A. J.; Cammi, R.; Pomelli, C.; Ochterski, J. W.; Martin, R. L.; Morokuma, K.; Zakrzewski, V. G.; Voth, G. A.; Salvador, P.; Dannenberg, J. J.; Dapprich, S.; Daniels, A. D.; Farkas, Ö.; Foresman, J. B.; Ortiz, J. V.; Cioslowski, J.; Fox, D. J. Gaussian, Inc., Wallingford CT, **2009**.

2. Liu, J.; Tonigold, M.; Bredenkötter, B.; Schröder, T.; Mattay, J.; Volkmer, D. *Tetrahedron Lett.* **2009**, *50*, 1303-1306.

3. Mastalerz, M.; Dyker, G.; Flörke, U.; Henkel, G.; Oppel, I. M.; Merz, K. *Eur. J. Org. Chem.* **2006**, 4951-4962.

4. Aspley, C. J.; Gareth Williams, J. A. *New. J. Chem.* **2001**, *25*, 1136-1147.
